# Supplementary material for: Aza-Knoevenagel-type condensation of secondary amides: direct access to N-monosubstituted β,β-difunctionalized enamines
Source: Royal Society of Chemistry journal article supplement (doi:10.1039/c5qo00191a), 2015-01-01

*Electronic Supplementary Information for*

**Aza-Knoevenagel-type Condensation of Secondary Amides: A Direct Access to  
N-Monosubstituted  $\beta,\beta$ -difunctionalized Enamines**

Pei-Qiang Huang<sup>a,b,\*</sup> and Wei Ou,<sup>a</sup> Jian-Liang Ye<sup>a</sup>

<sup>a</sup> *Department of Chemistry, Fujian Provincial Key Laboratory of Chemical Biology,  
iChEM (Collaborative Innovation Center of Chemistry for Energy Materials), College  
of Chemistry and Chemical Engineering, Xiamen University, Xiamen, Fujian 361005,  
P. R. China*

<sup>b</sup> *State Key Laboratory of Elemento-Organic Chemistry, Nankai University, Tianjin  
300071, P. R. China*

E-mail: [pqhuang@xmu.edu.cn](mailto:pqhuang@xmu.edu.cn)

**Contents (28 pages):**

- <sup>1</sup>H and <sup>13</sup>C NMR spectra of compounds **1a~1z**, **1aa**, **1ab** (pp. 2-29)

$^1\text{H}$  and  $^{13}\text{C}$  NMR spectra of compound **1a**:

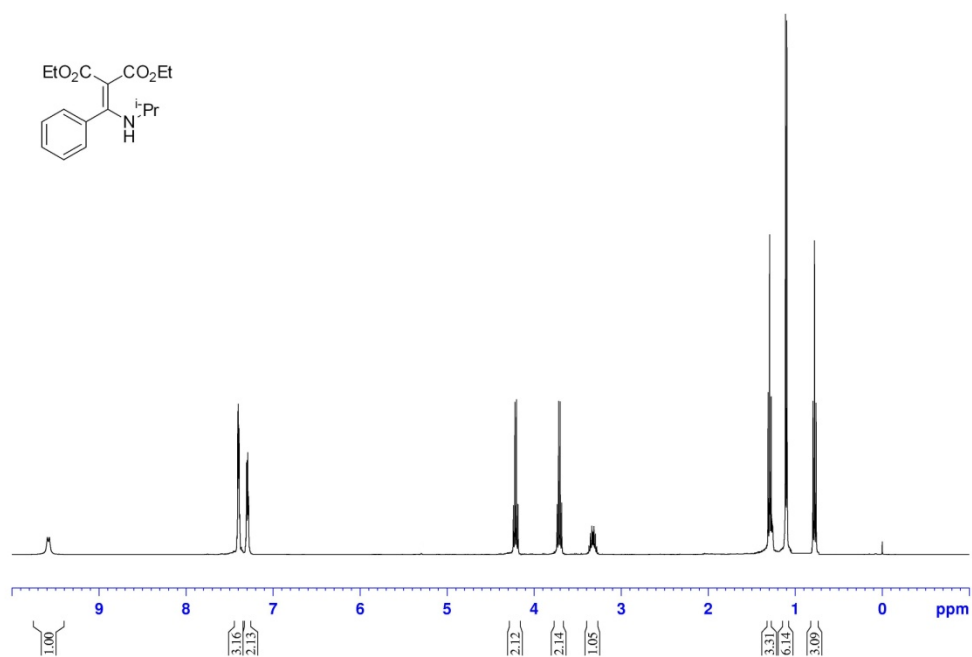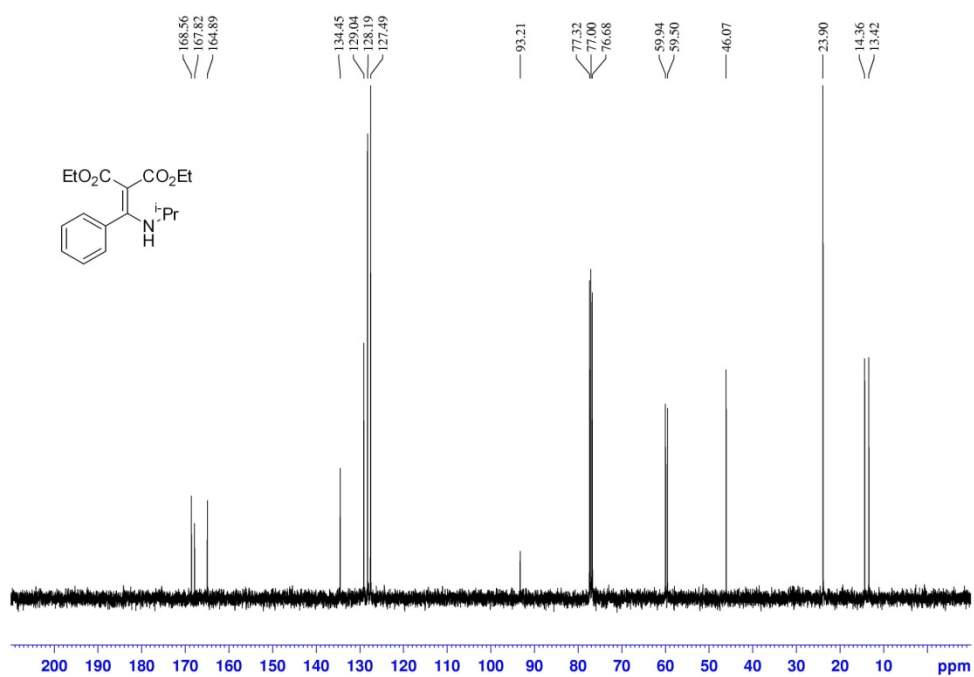

$^1\text{H}$  and  $^{13}\text{C}$  NMR spectra of compound **1b**:

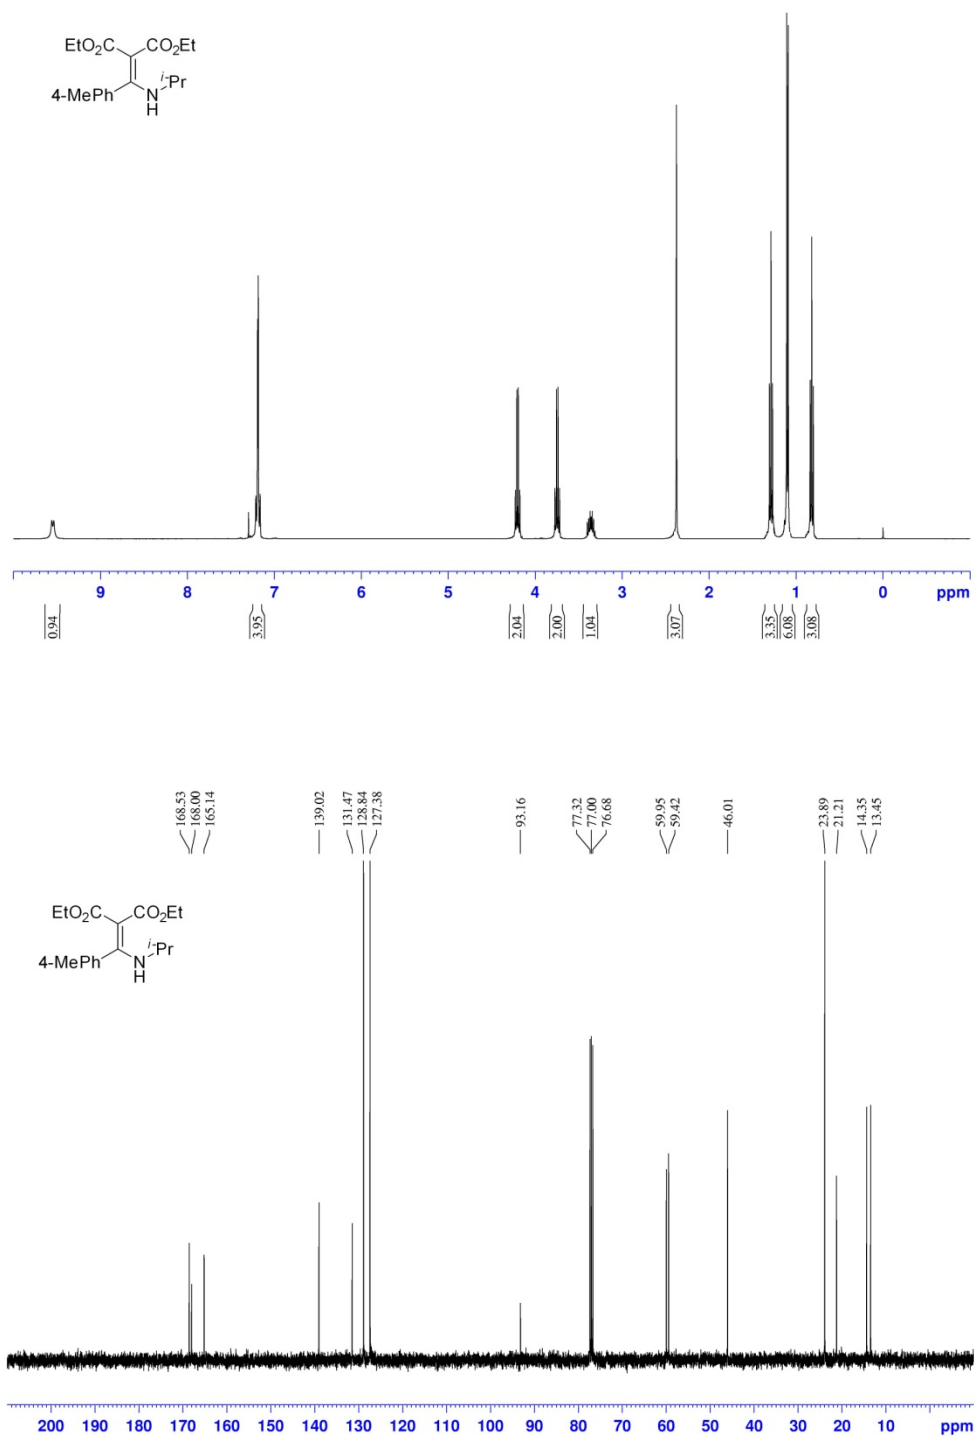

$^1\text{H}$  and  $^{13}\text{C}$  NMR spectra of compound **1c**:

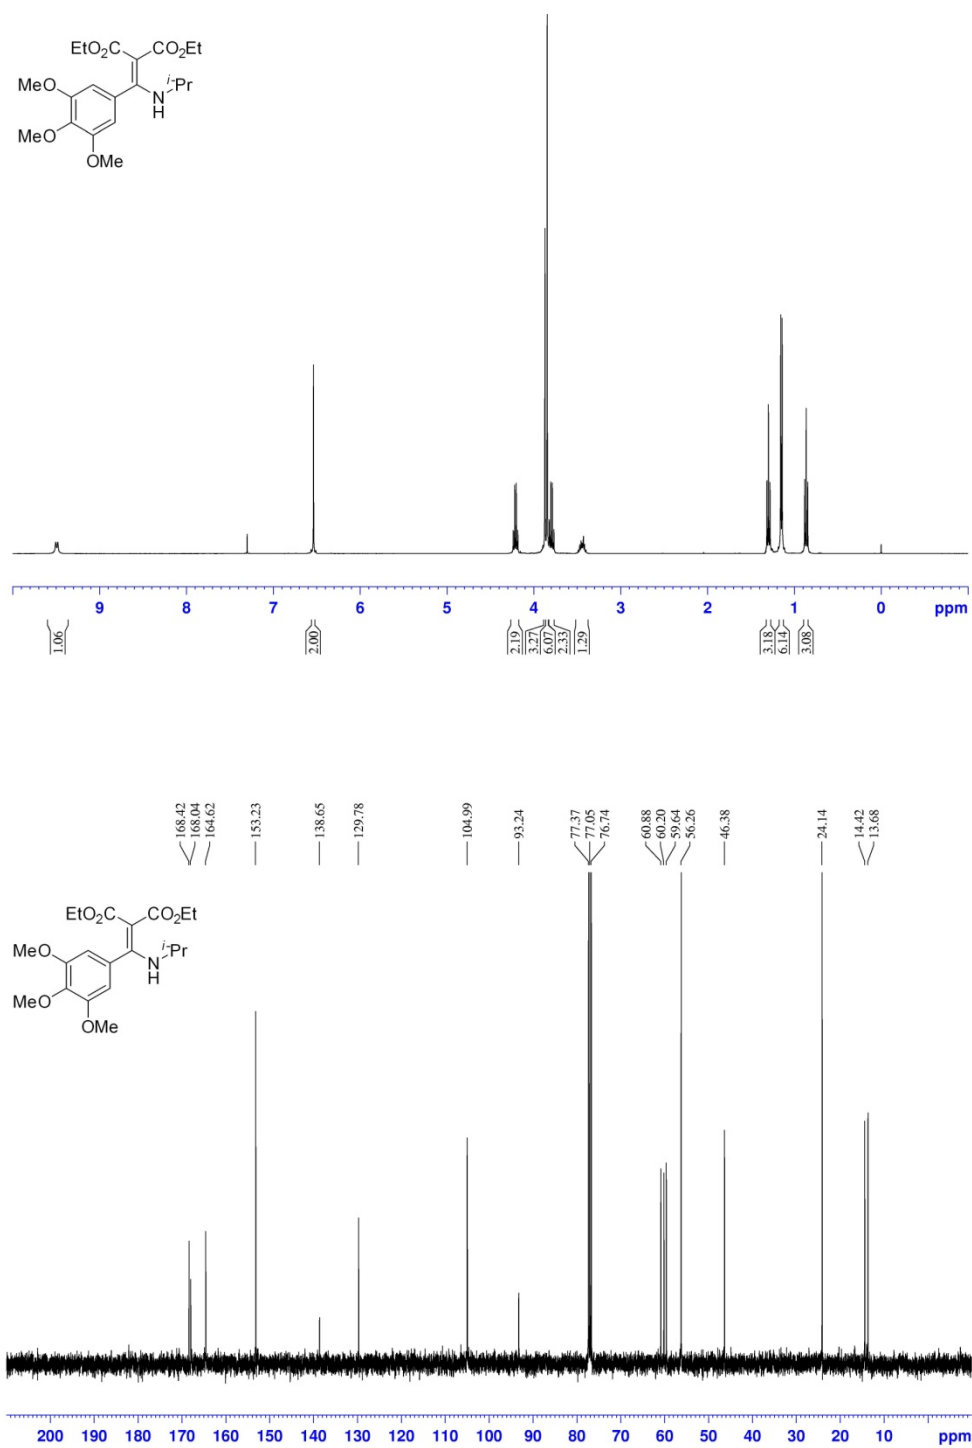

$^1\text{H}$  and  $^{13}\text{C}$  NMR spectra of compound **1d**:

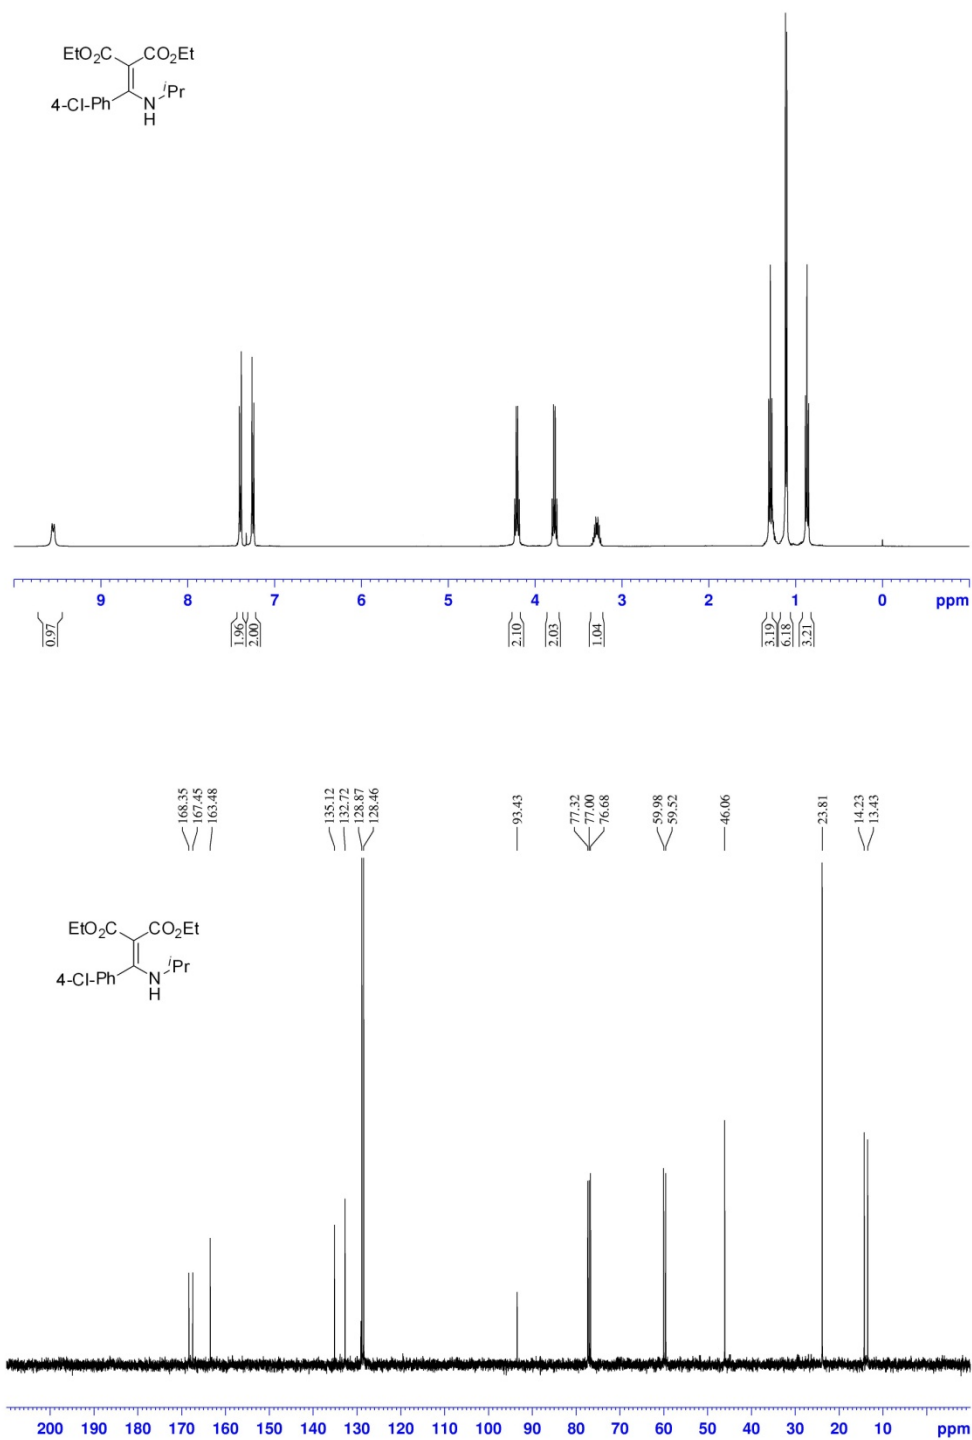

$^1\text{H}$  and  $^{13}\text{C}$  NMR spectra of compound **1e**:

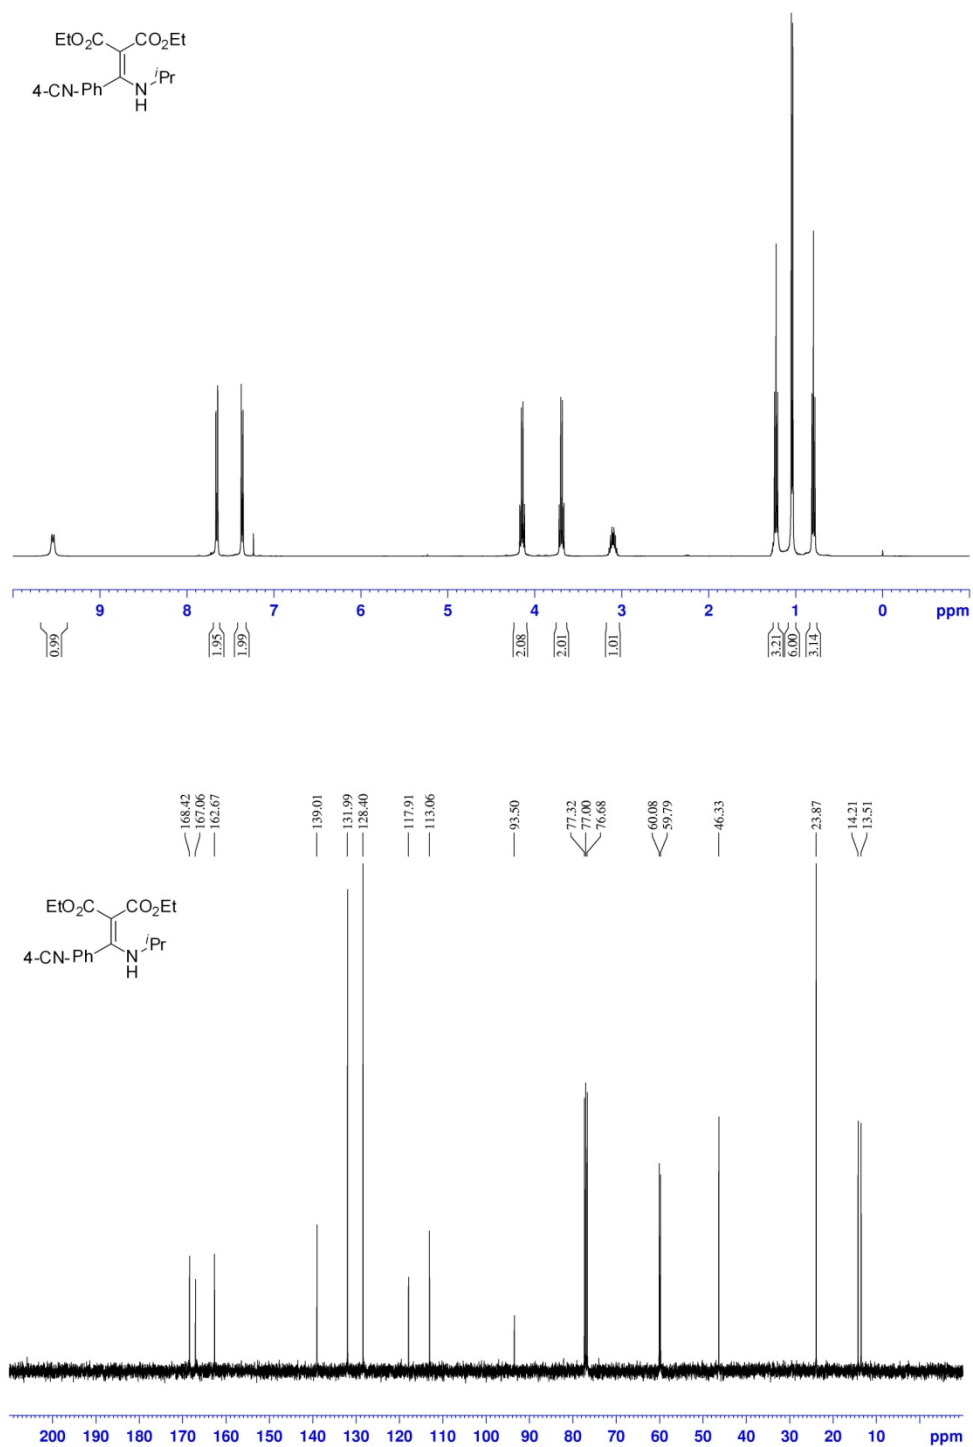

$^1\text{H}$  and  $^{13}\text{C}$  NMR spectra of compound **1f**:

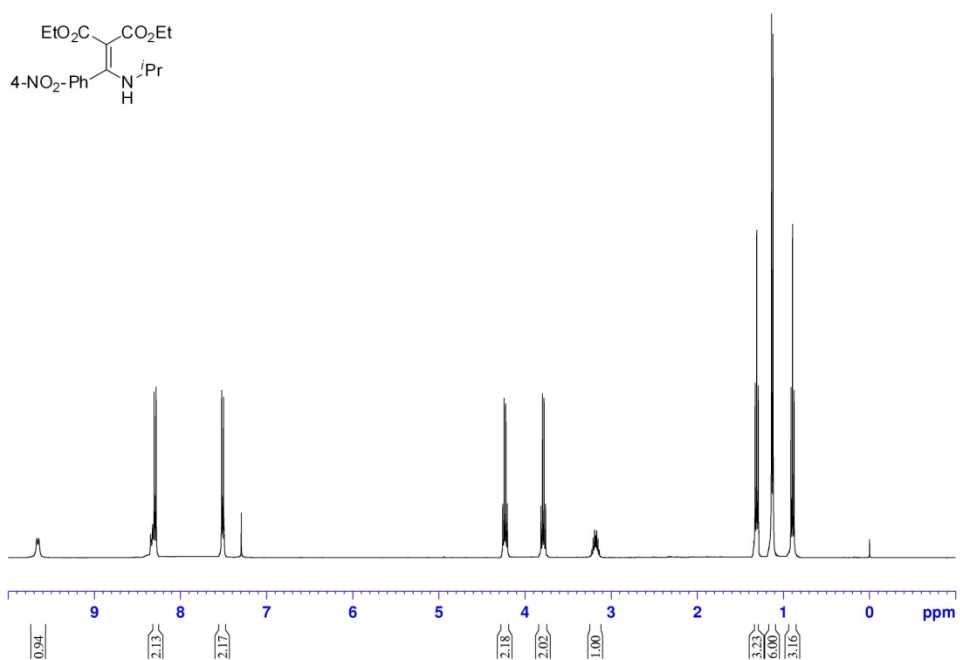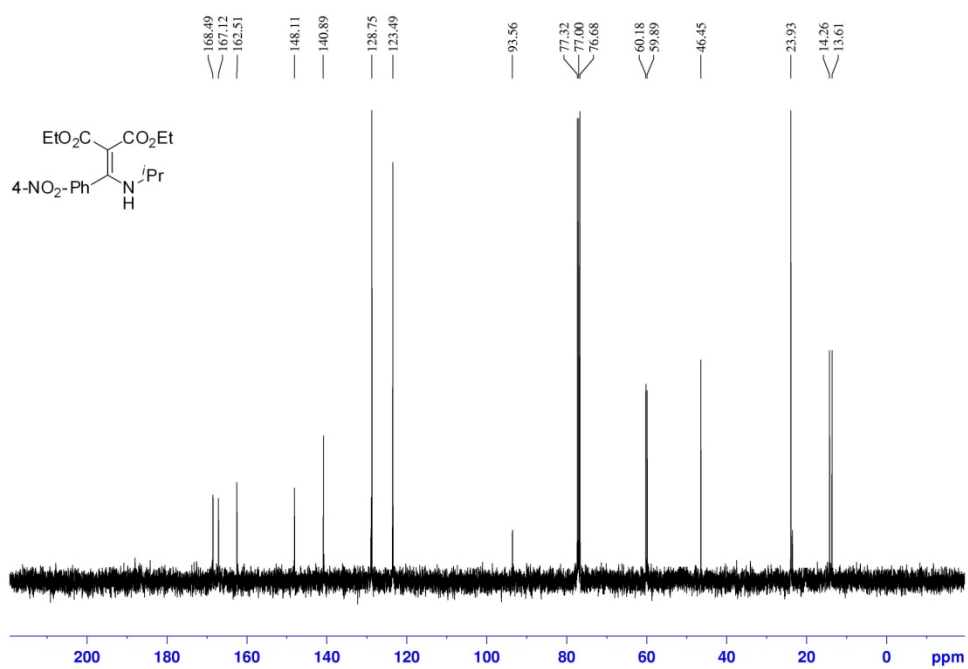

$^1\text{H}$  and  $^{13}\text{C}$  NMR spectra of compound **1g**:

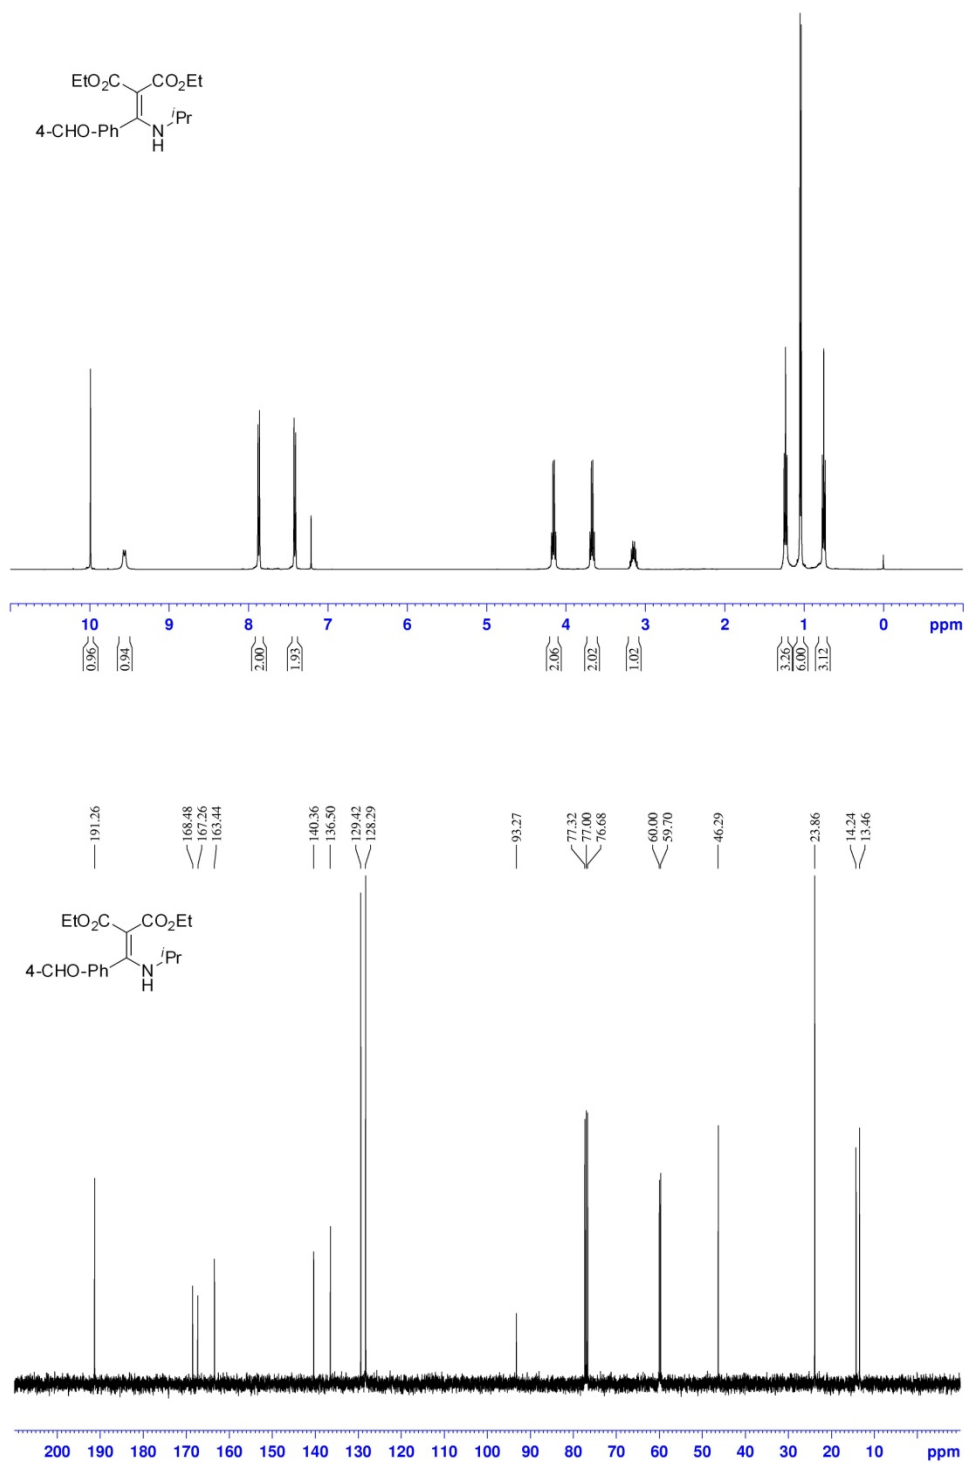



$^1\text{H}$  and  $^{13}\text{C}$  NMR spectra of compound **1h**:

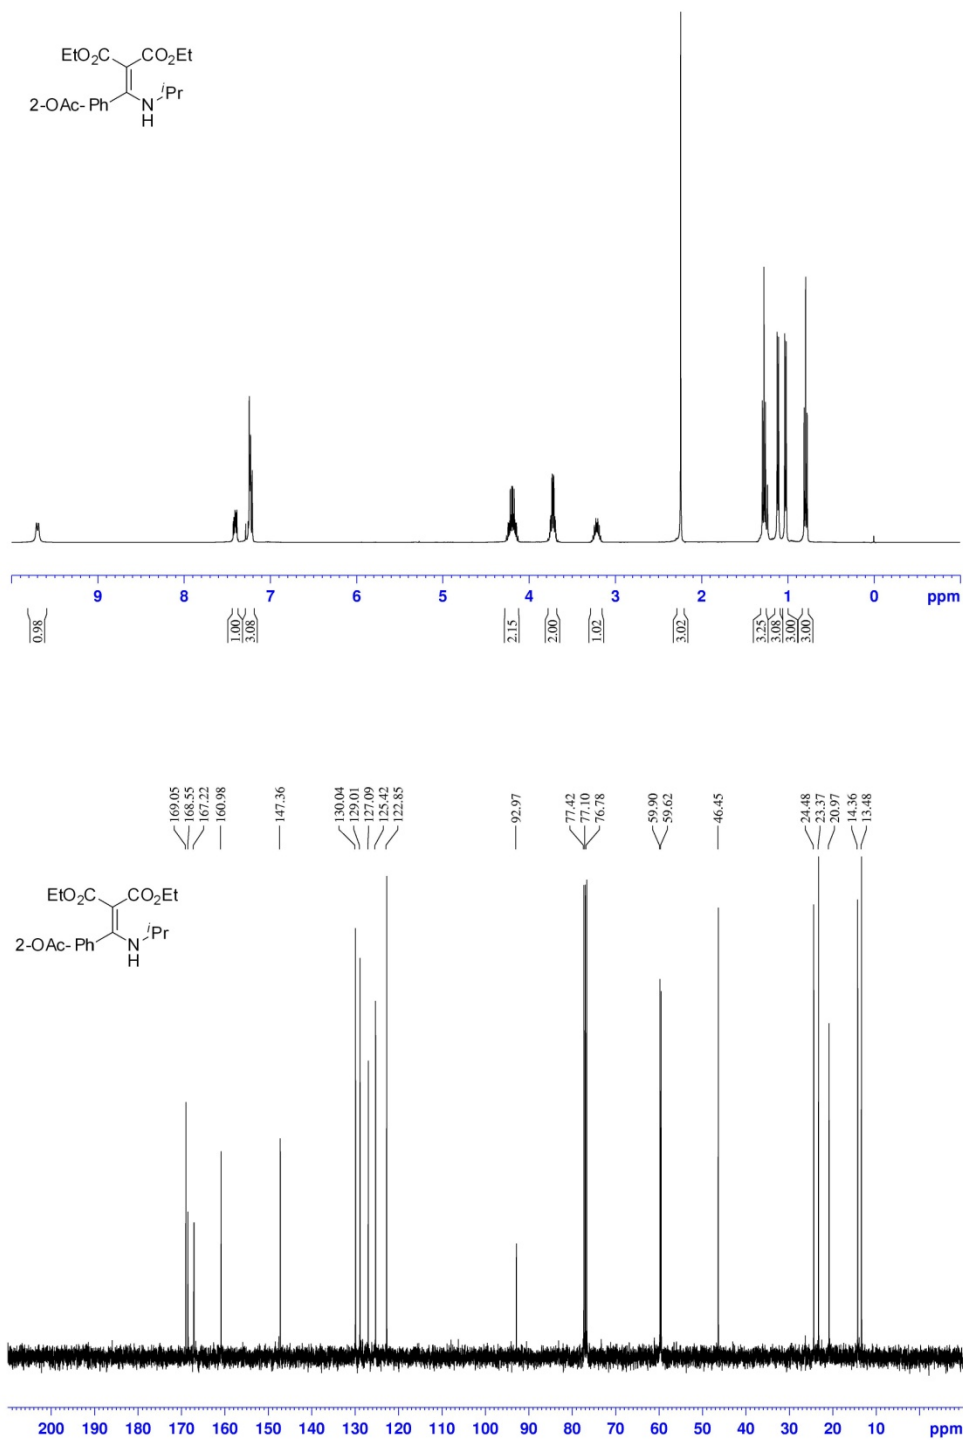

$^1\text{H}$  and  $^{13}\text{C}$  NMR spectra of compound **1i**:

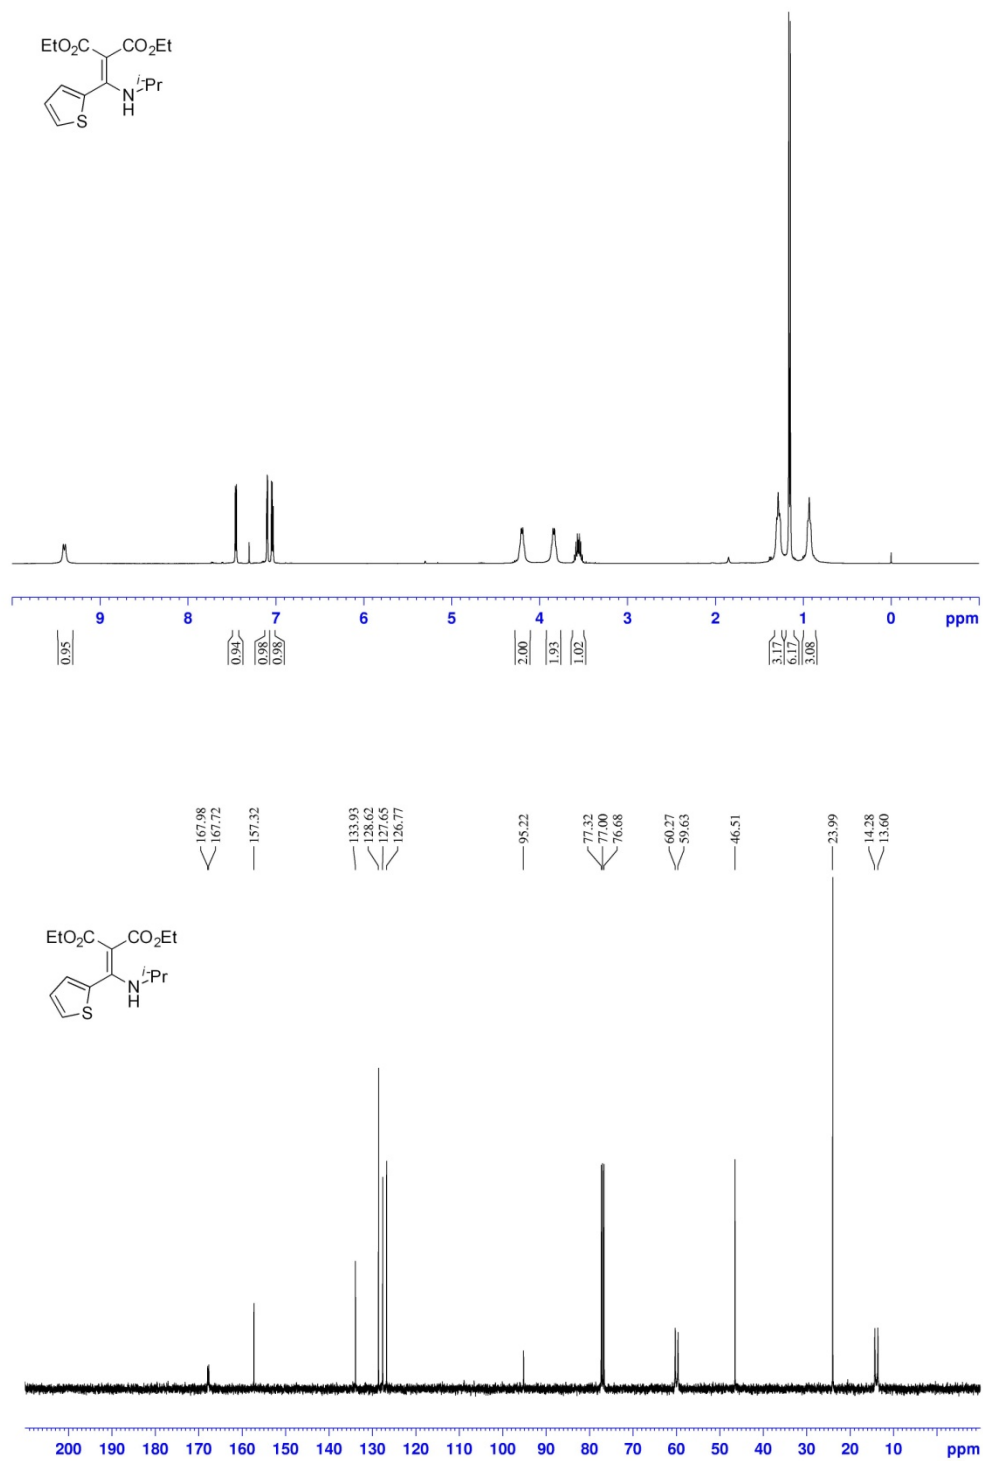

$^1\text{H}$  and  $^{13}\text{C}$  NMR spectra of compound **1j**:

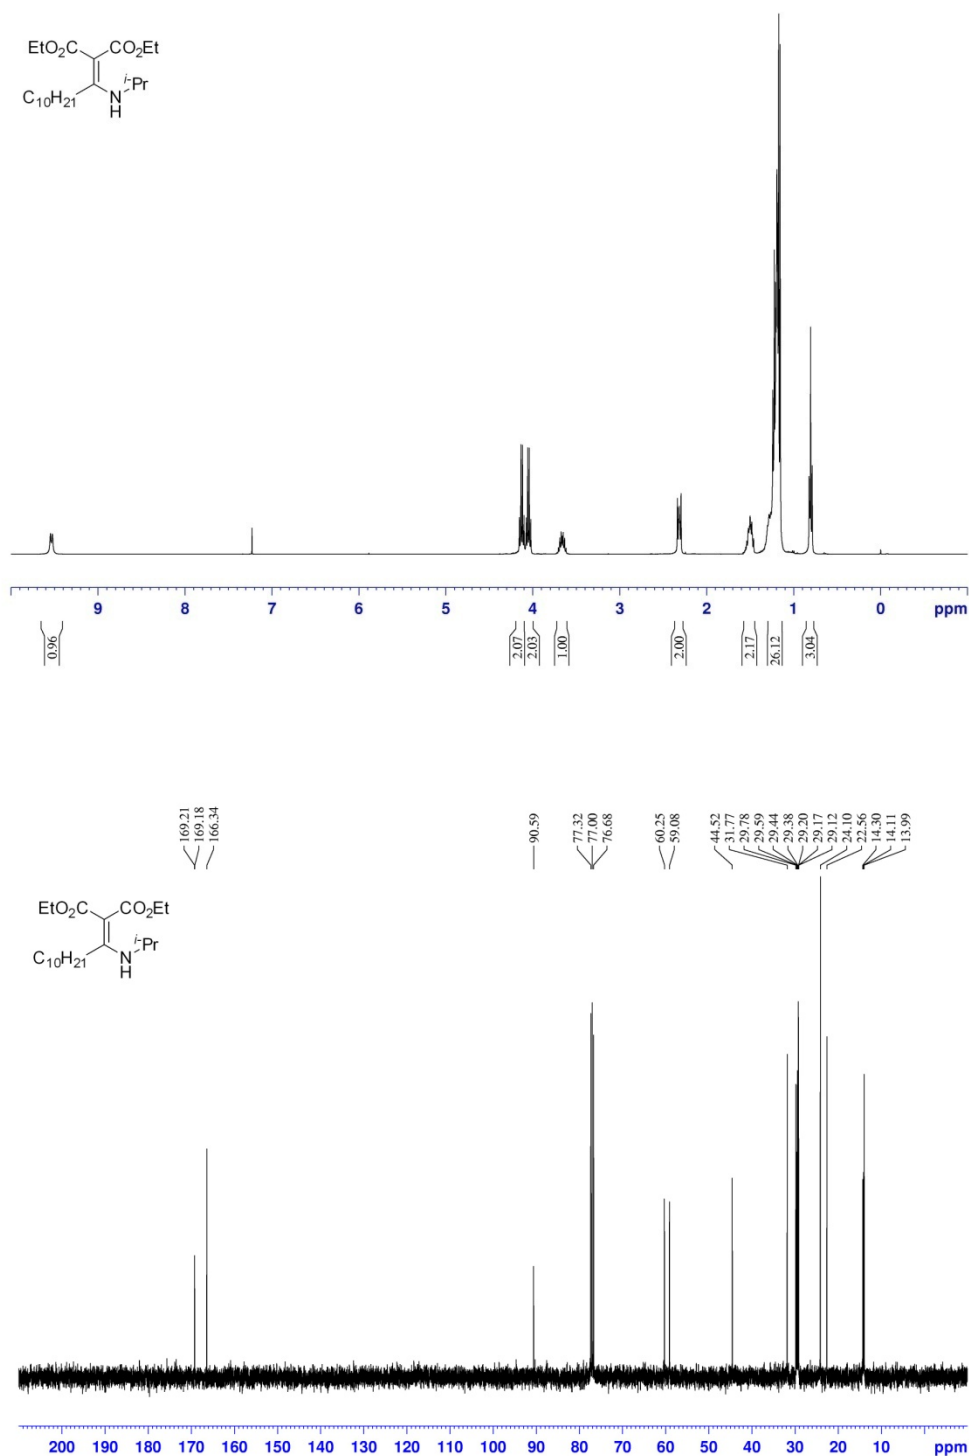

$^1\text{H}$  and  $^{13}\text{C}$  NMR spectra of compound **1k**:

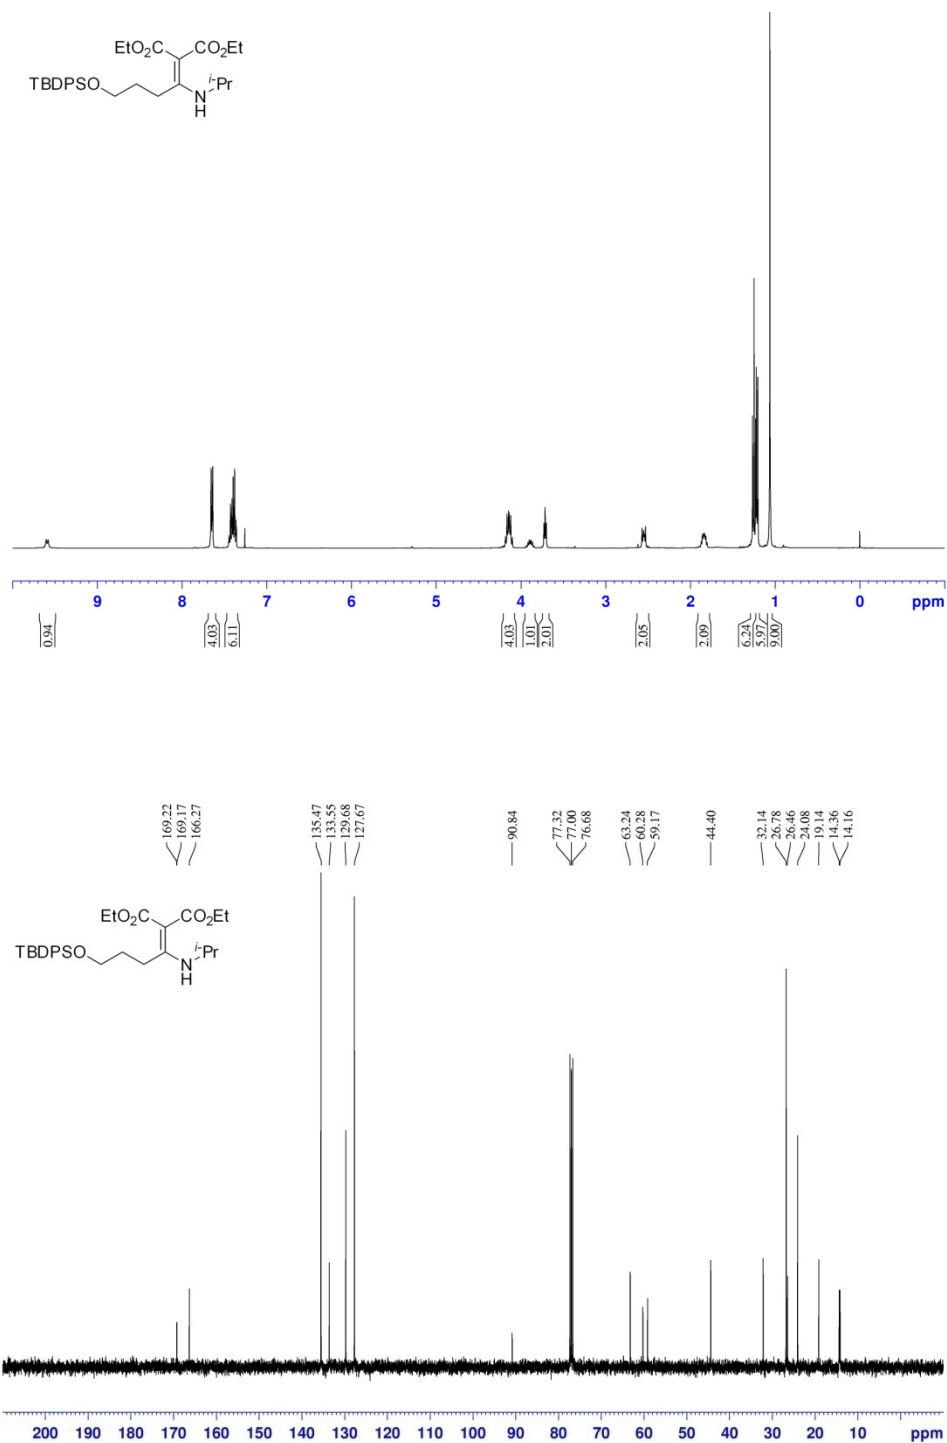

$^1\text{H}$  and  $^{13}\text{C}$  NMR spectra of compound **11**:

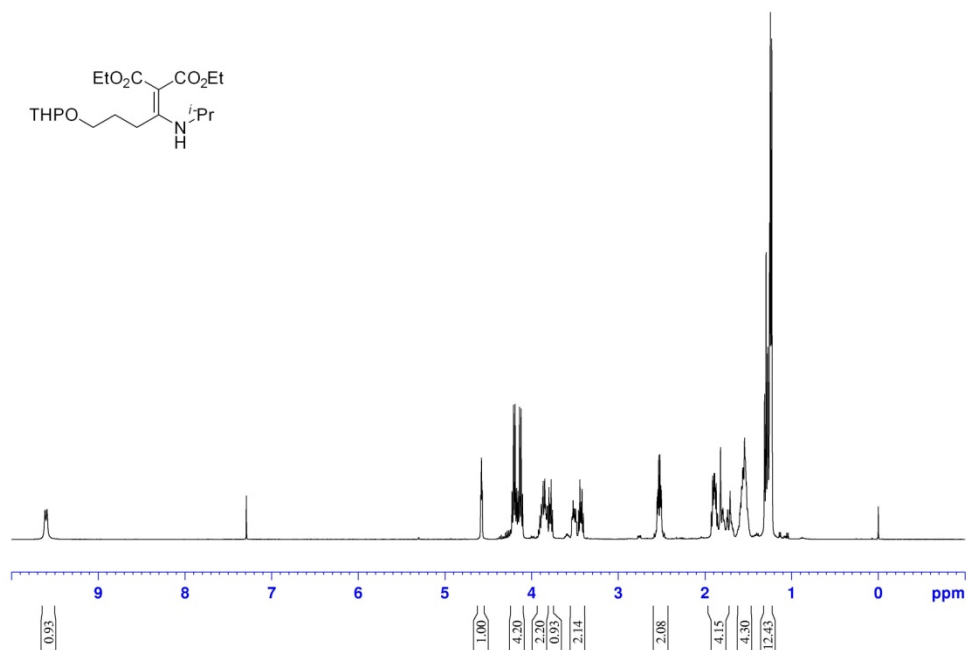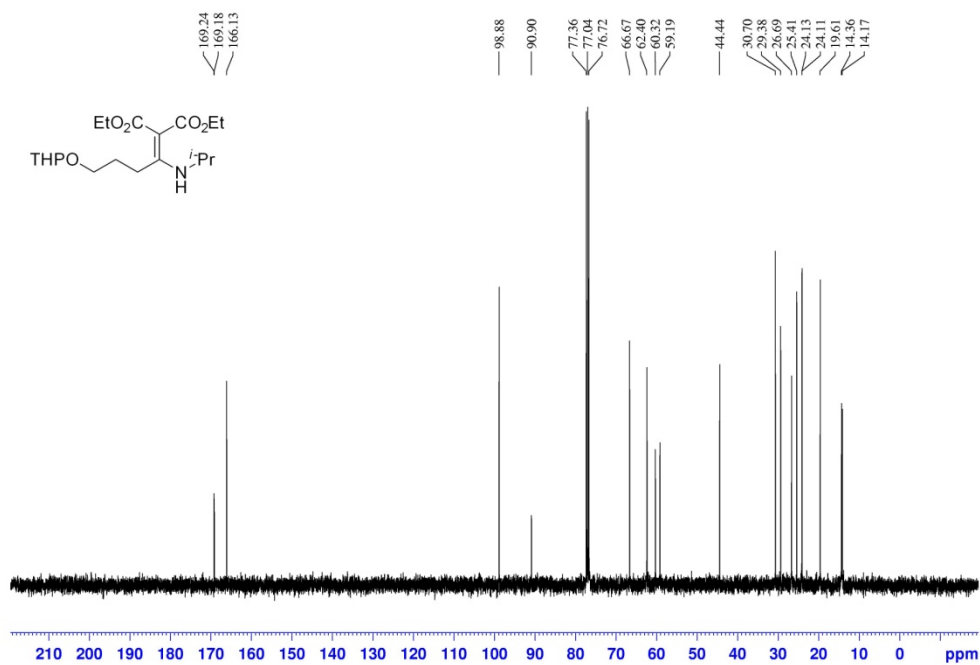

$^1\text{H}$  and  $^{13}\text{C}$  NMR spectra of compound **1m**:

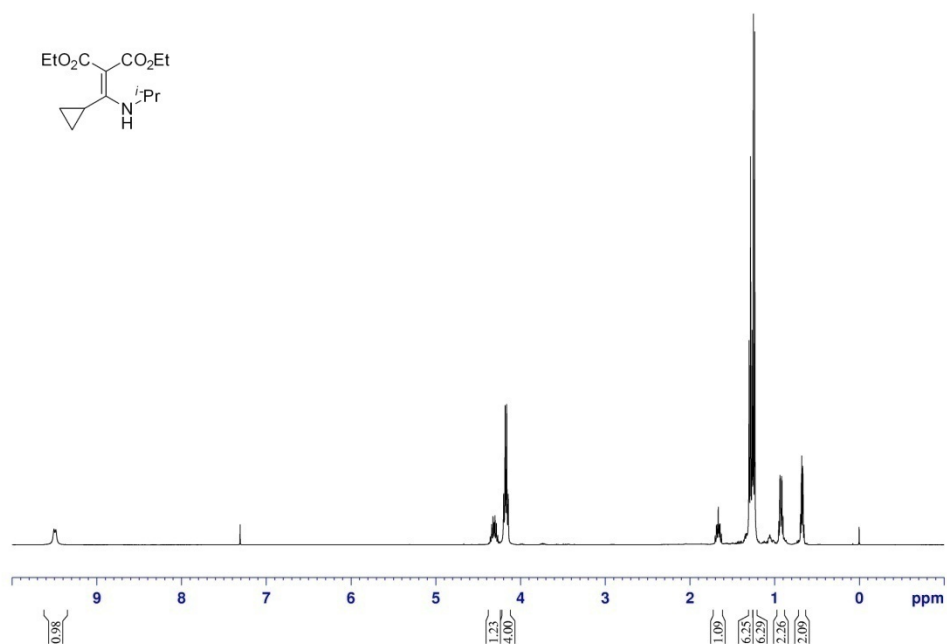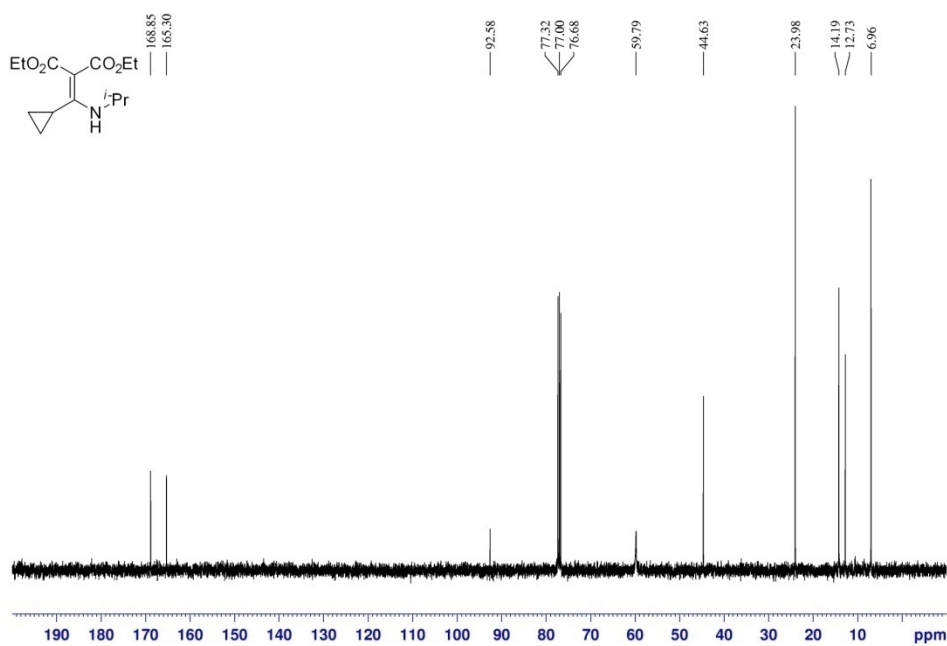

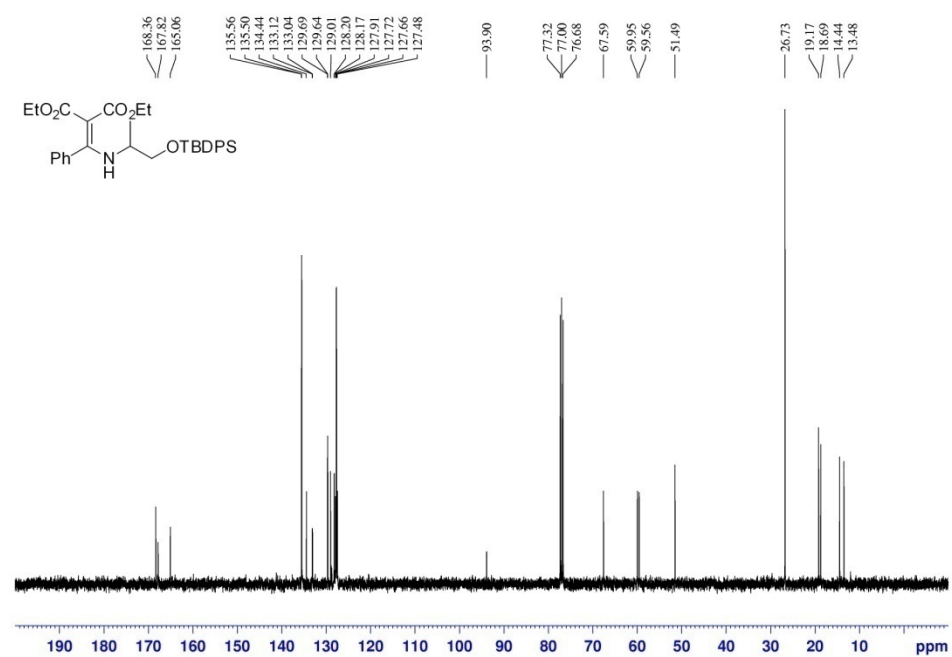

$^1\text{H}$  and  $^{13}\text{C}$  NMR spectra of compound **1o**:

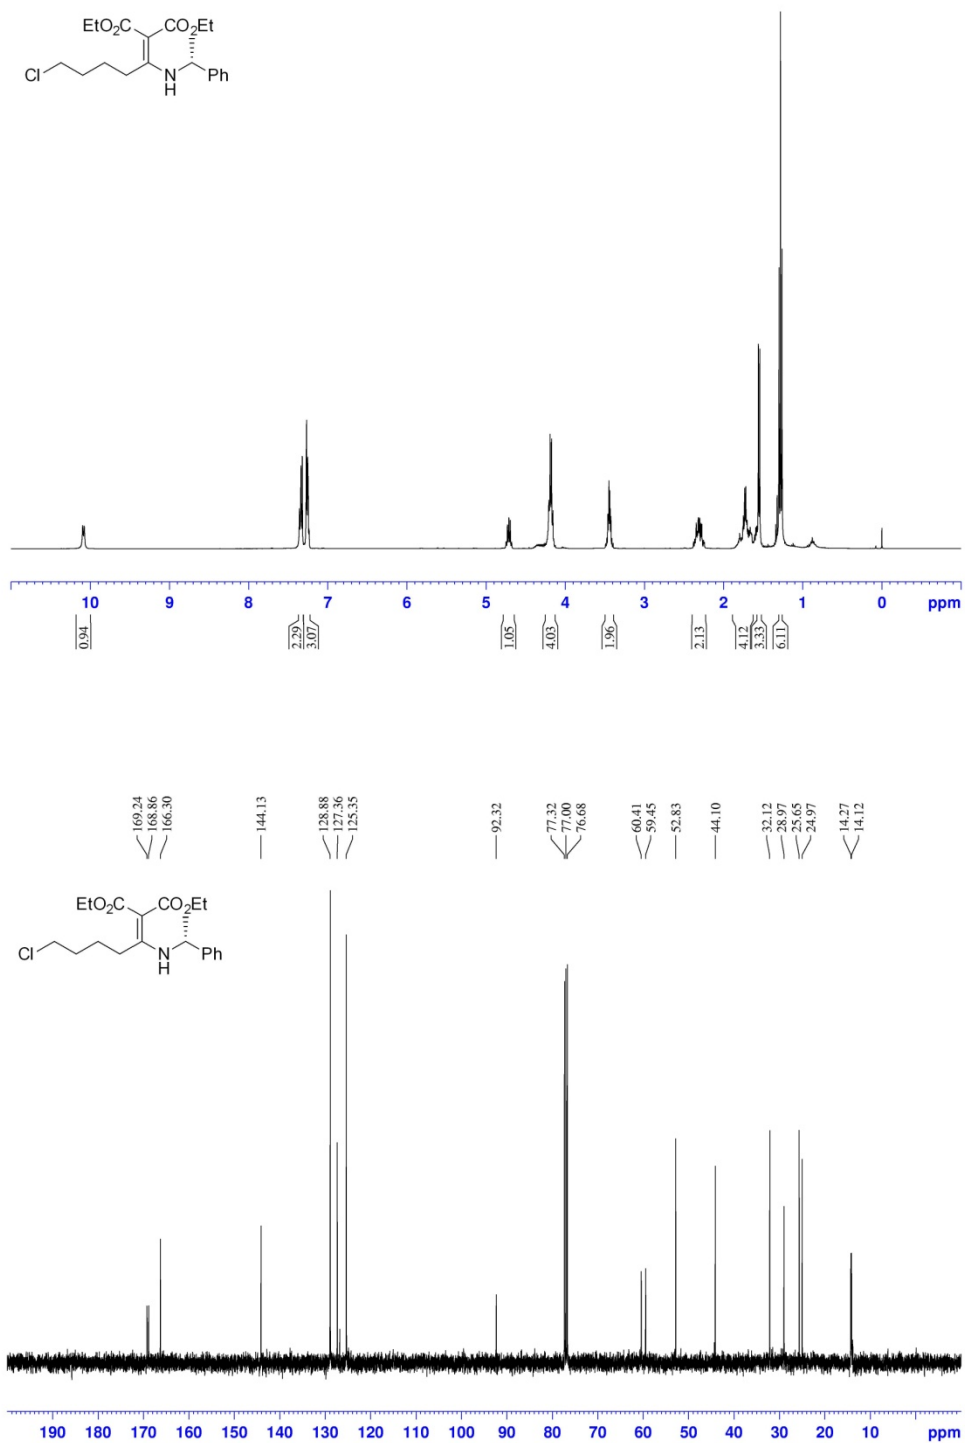



$^1\text{H}$  and  $^{13}\text{C}$  NMR spectra of compound **1p**:

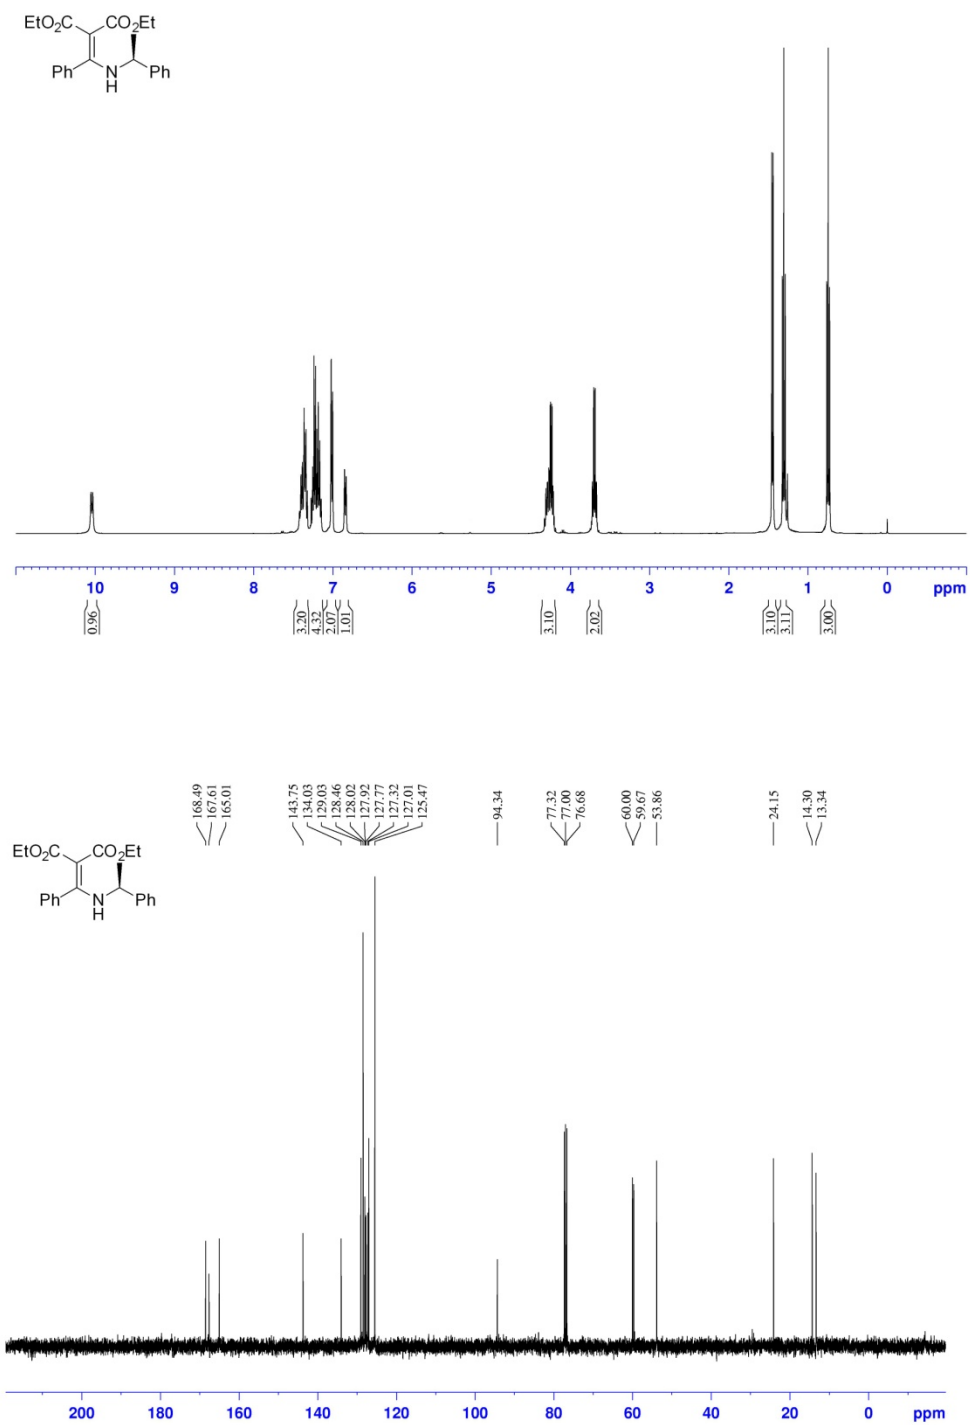

$^1\text{H}$  and  $^{13}\text{C}$  NMR spectra of compound **1q**:

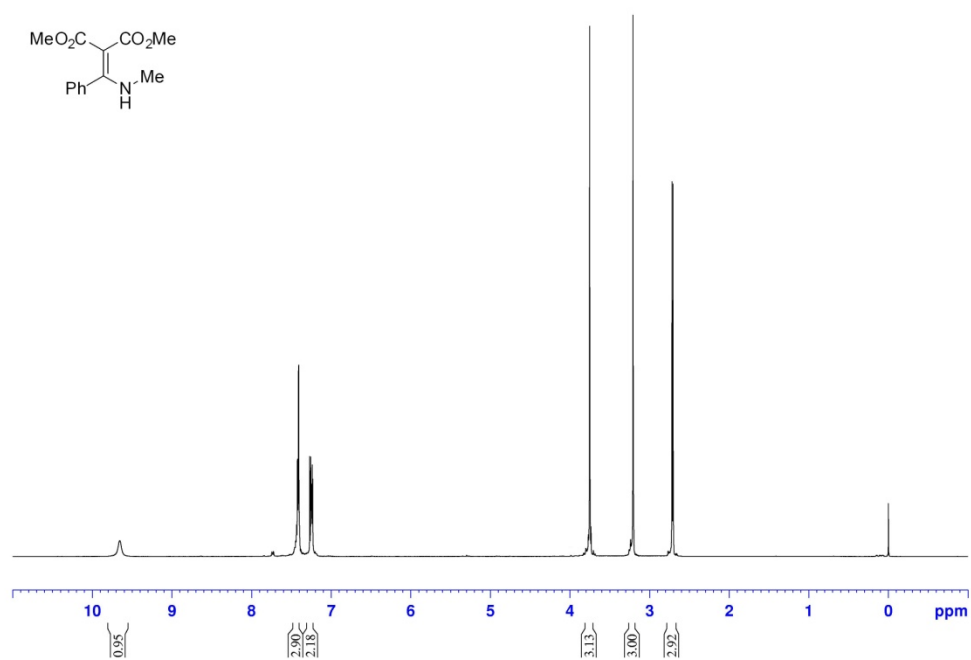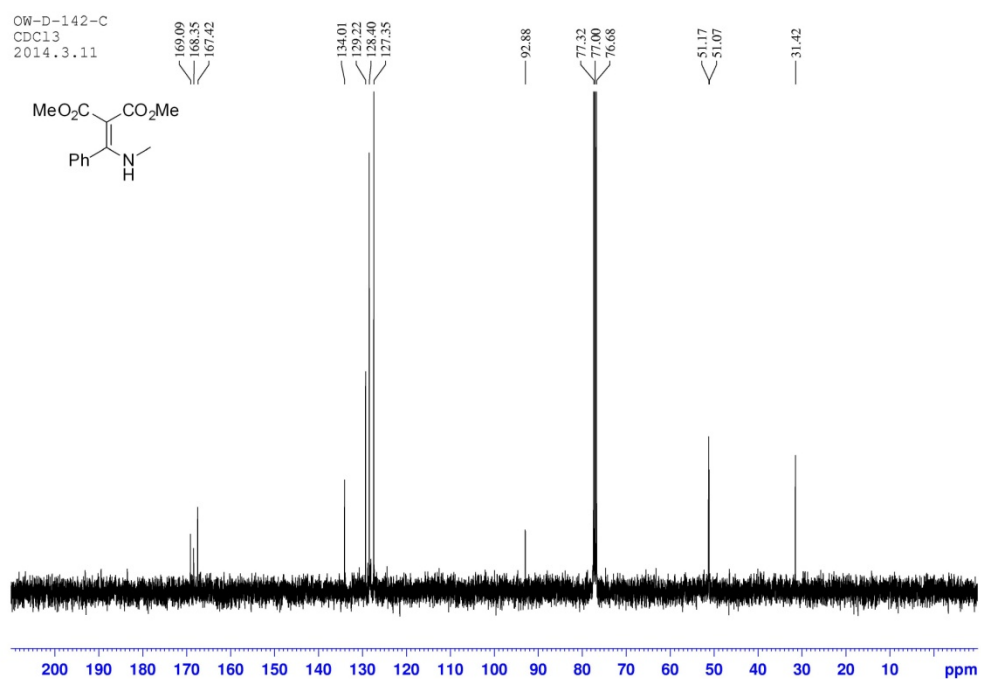

$^1\text{H}$  and  $^{13}\text{C}$  NMR spectra of compound **1s**:

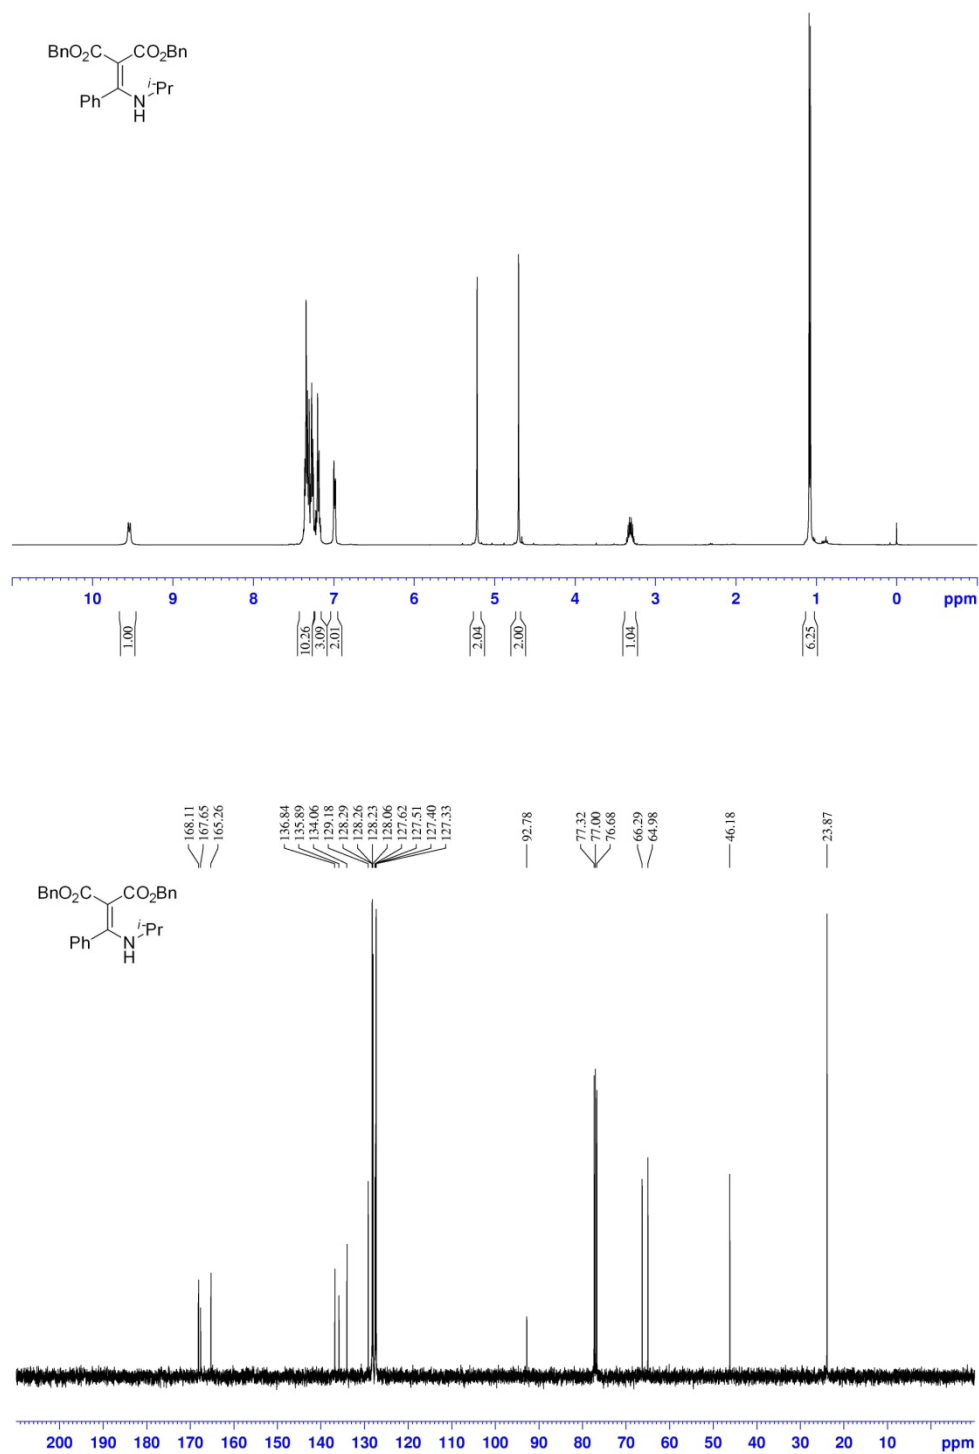

$^1\text{H}$  and  $^{13}\text{C}$  NMR spectra of compound **1t**:

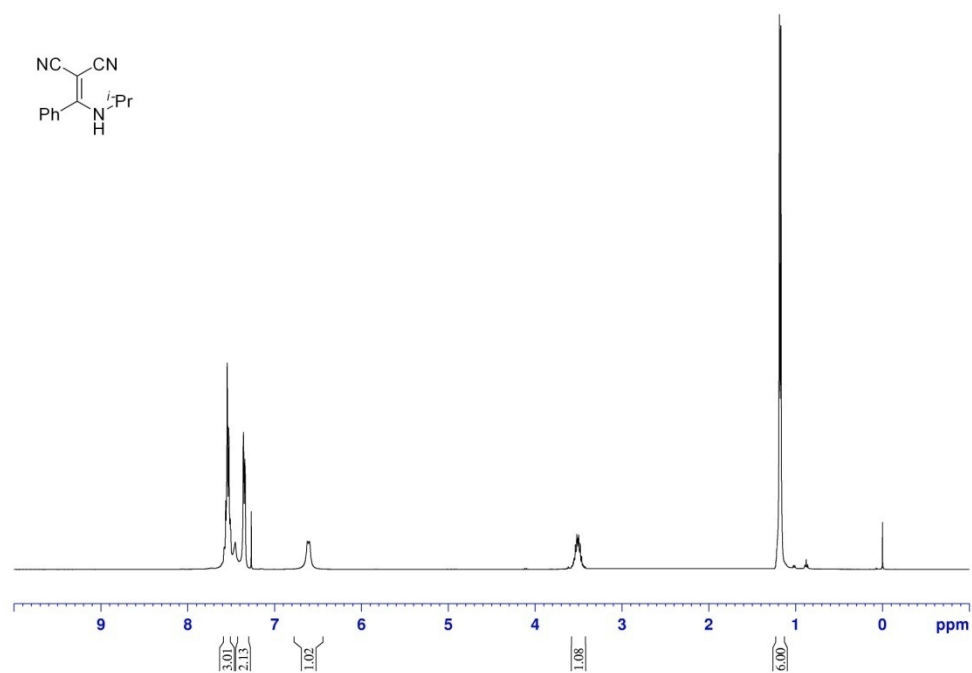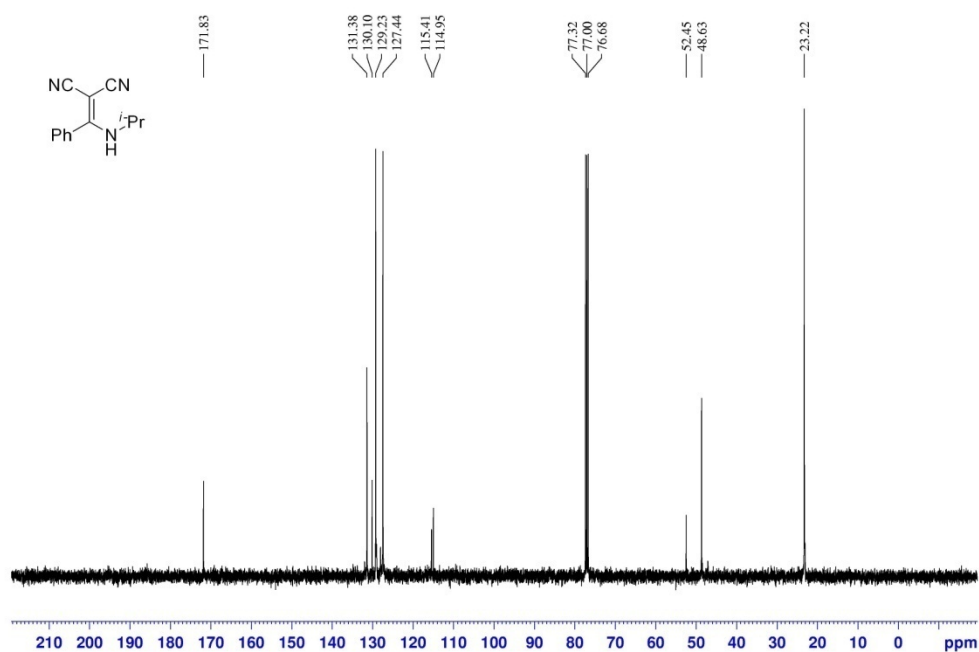

$^1\text{H}$  and  $^{13}\text{C}$  NMR spectra of compound **1u**:

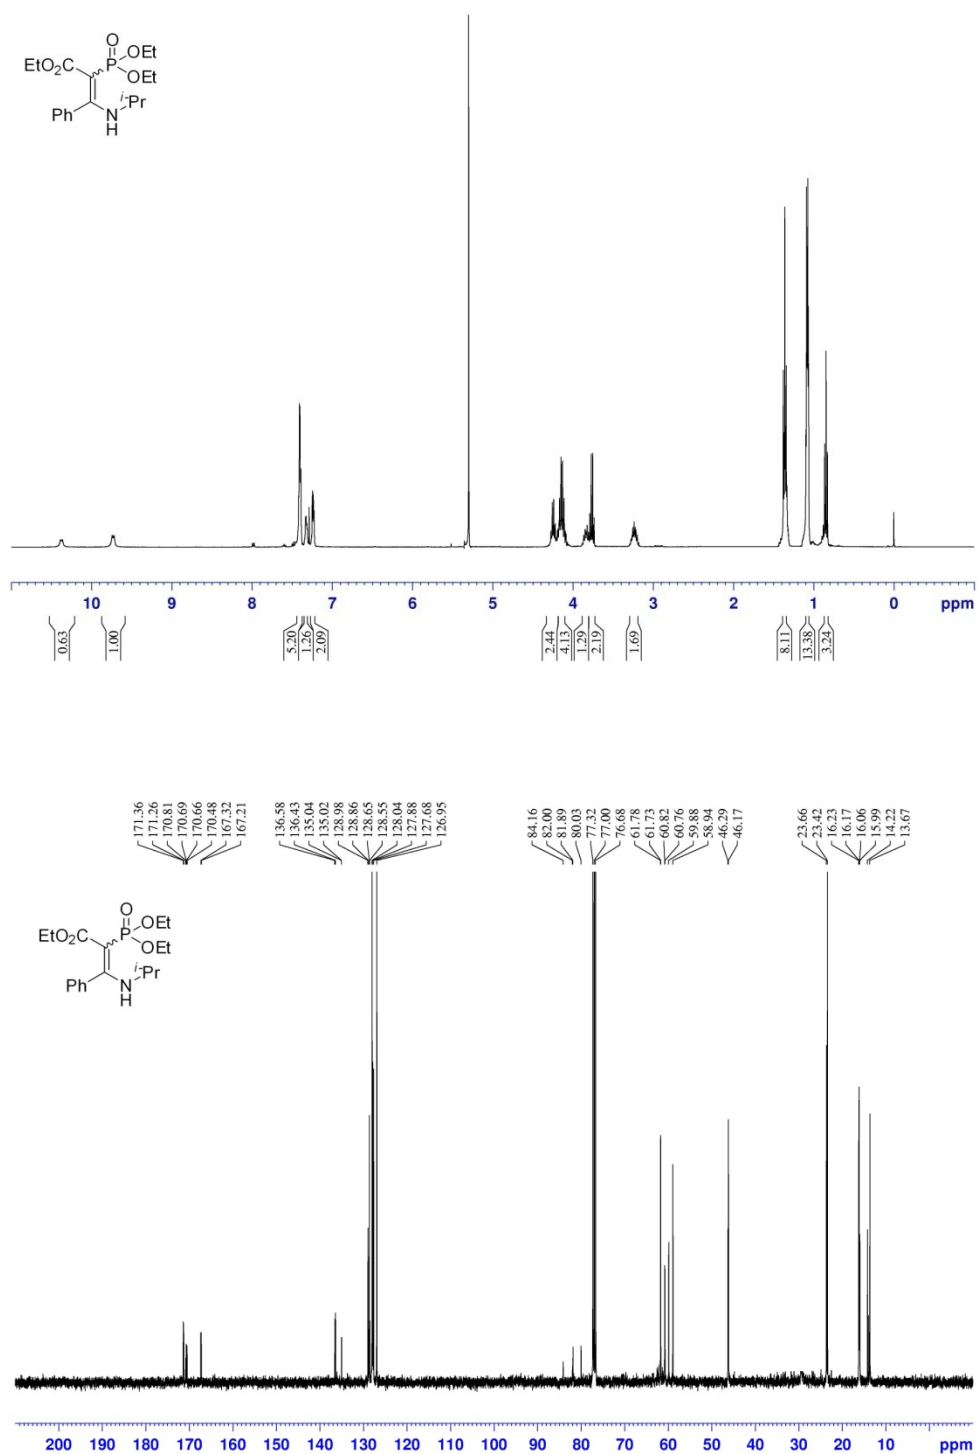

$^1\text{H}$  and  $^{13}\text{C}$  NMR spectra of compound **1v**:

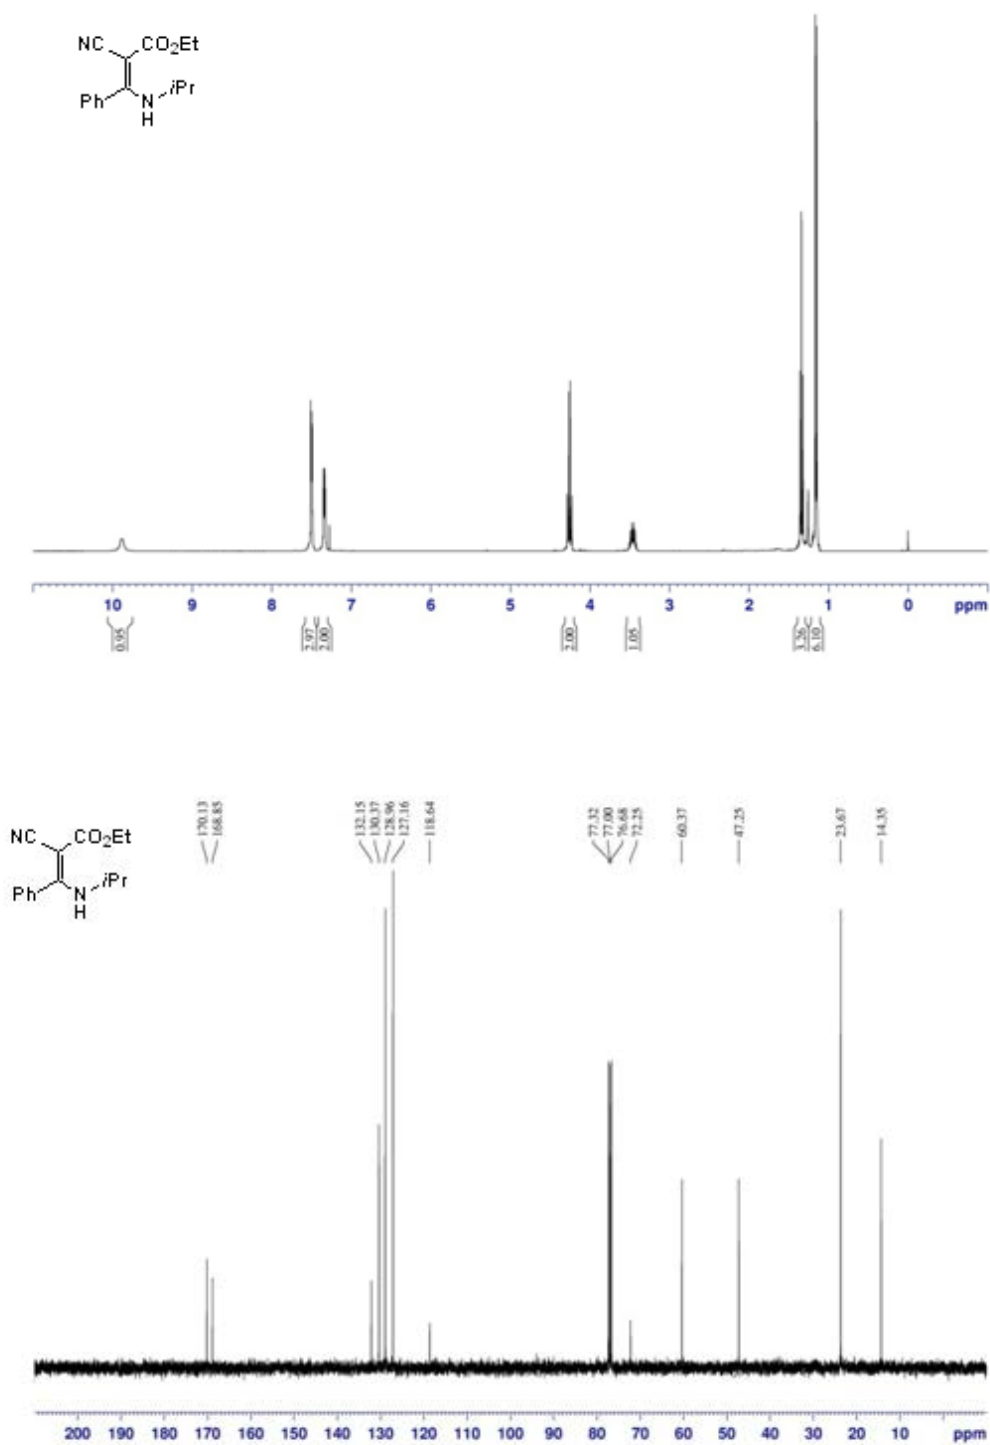

$^1\text{H}$  and  $^{13}\text{C}$  NMR spectra of compound **1w**:

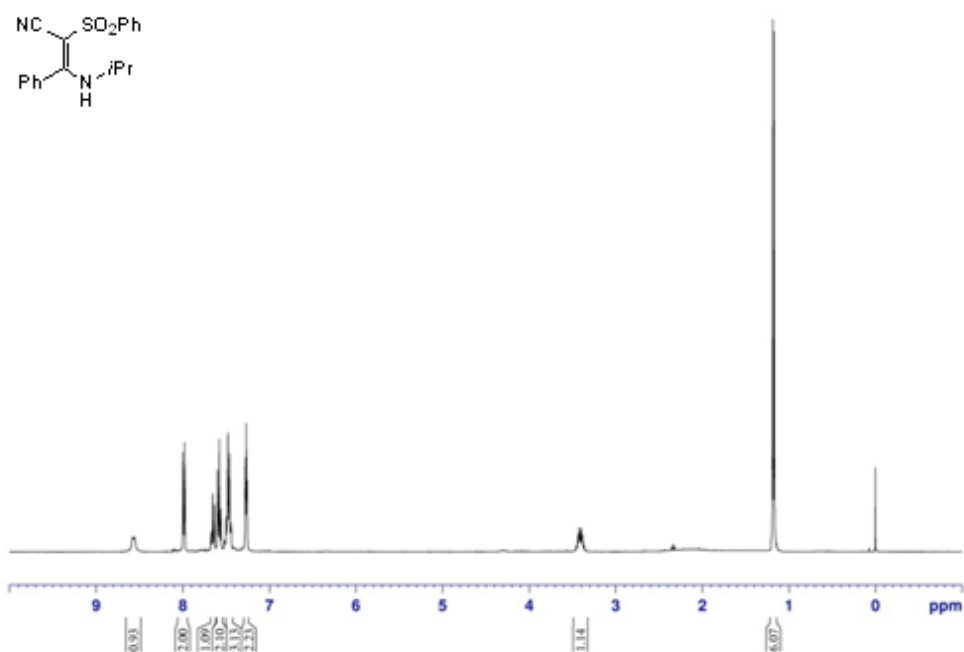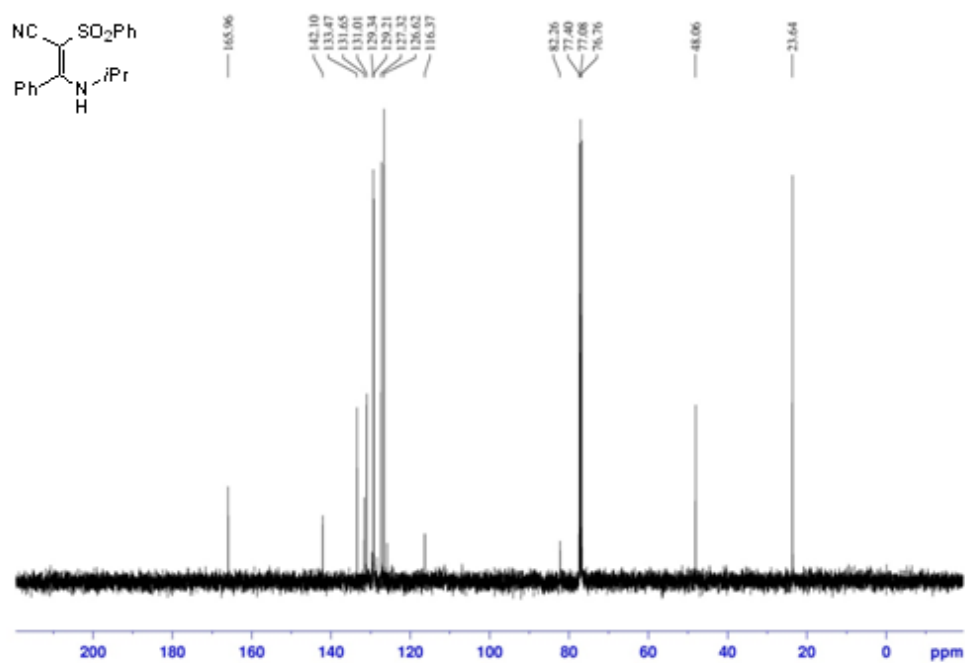

$^1\text{H}$  and  $^{13}\text{C}$  NMR spectra of compound **1x**:

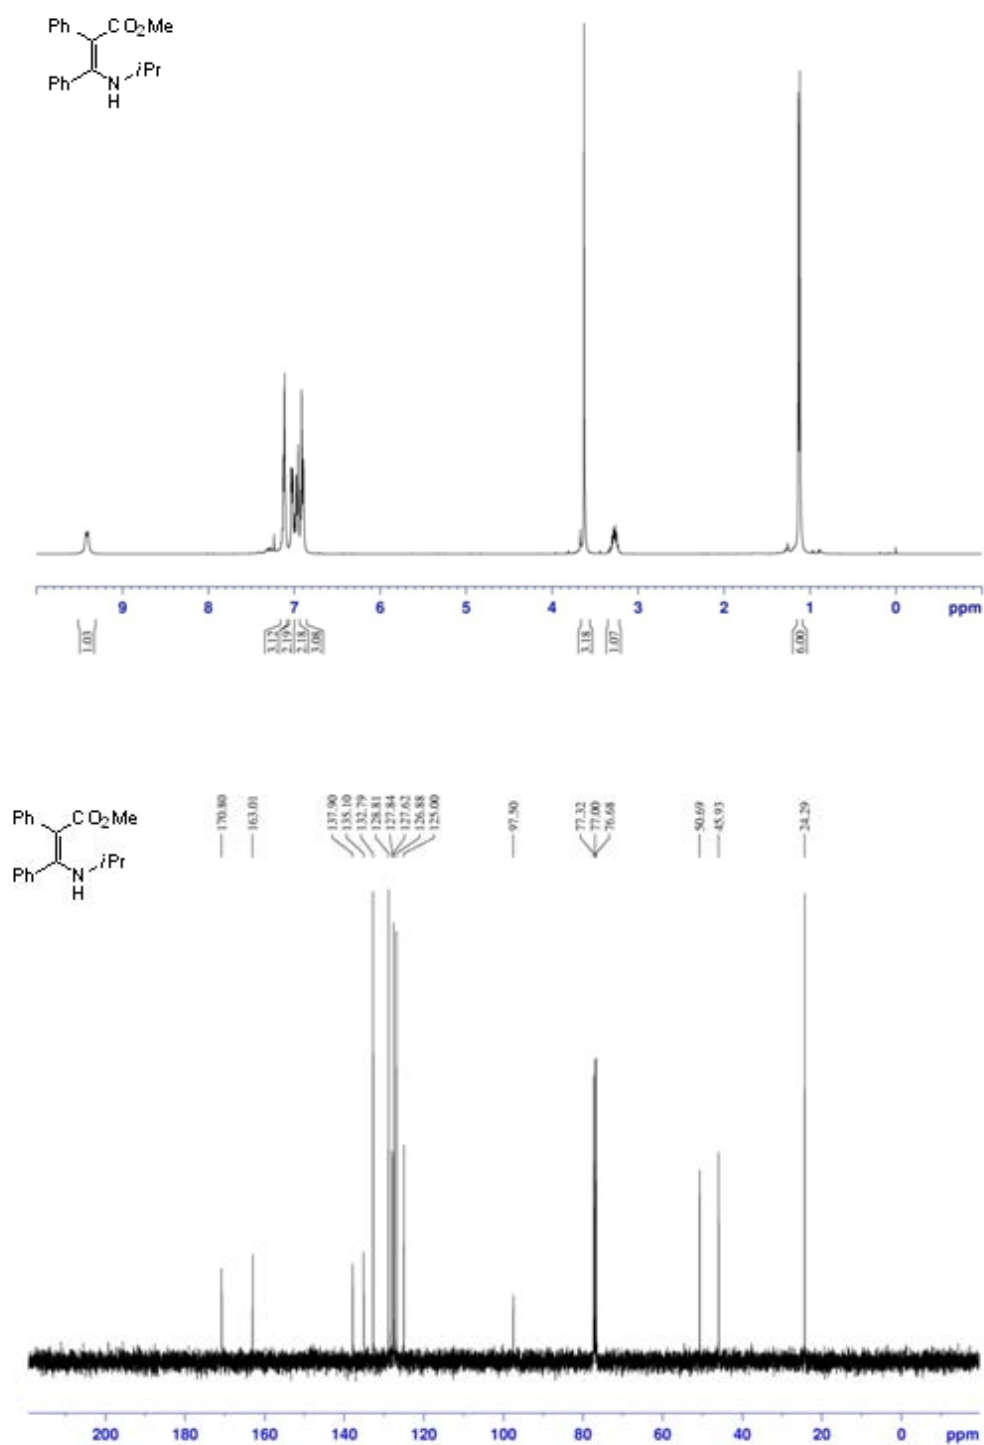



$^1\text{H}$  and  $^{13}\text{C}$  NMR spectra of compound **1y**:

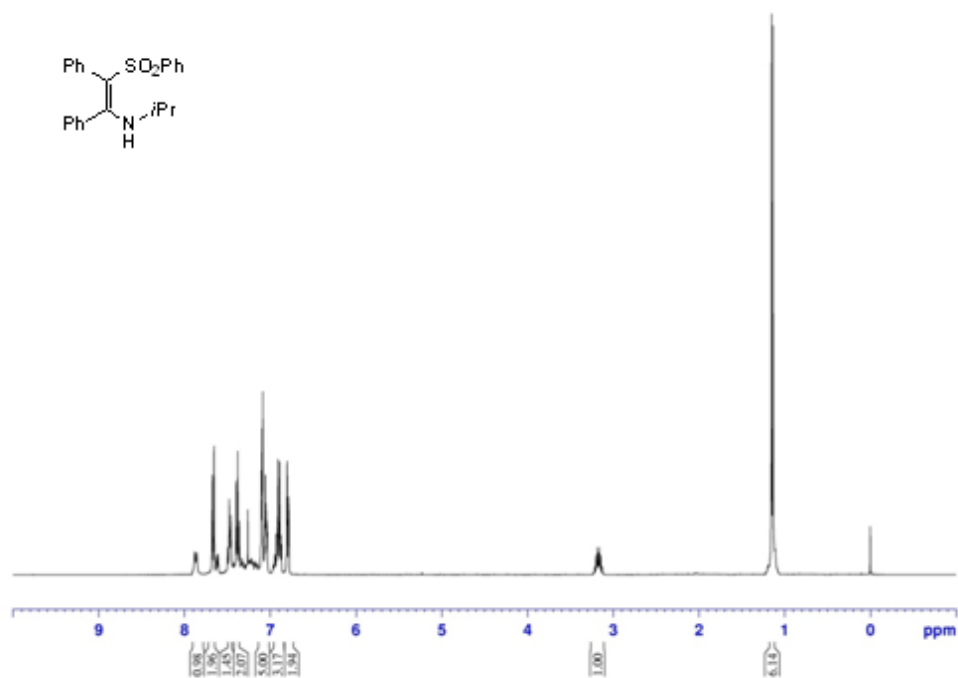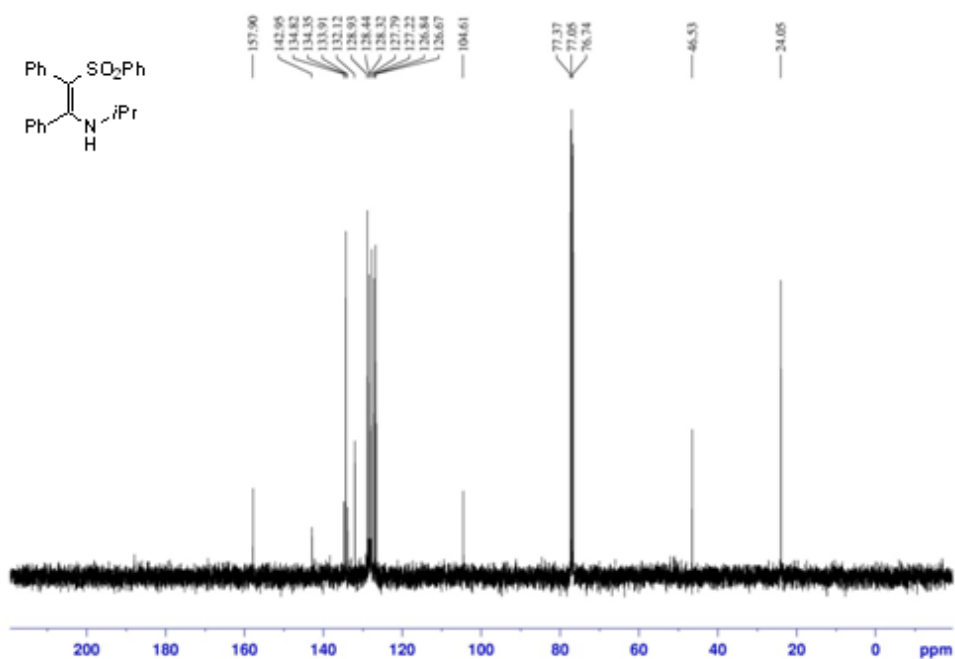

$^1\text{H}$  and  $^{13}\text{C}$  NMR spectra of compound **1z**:

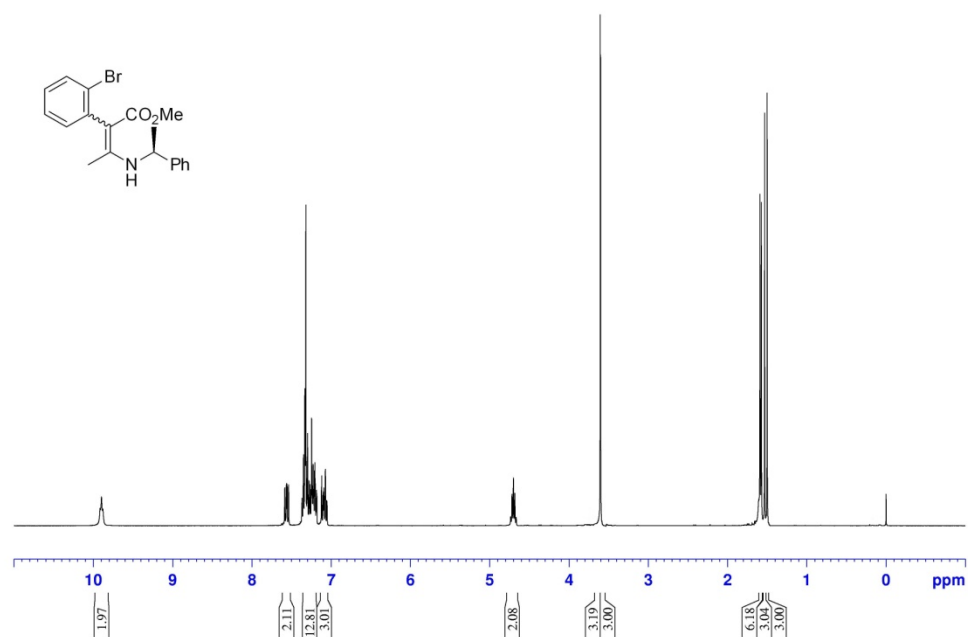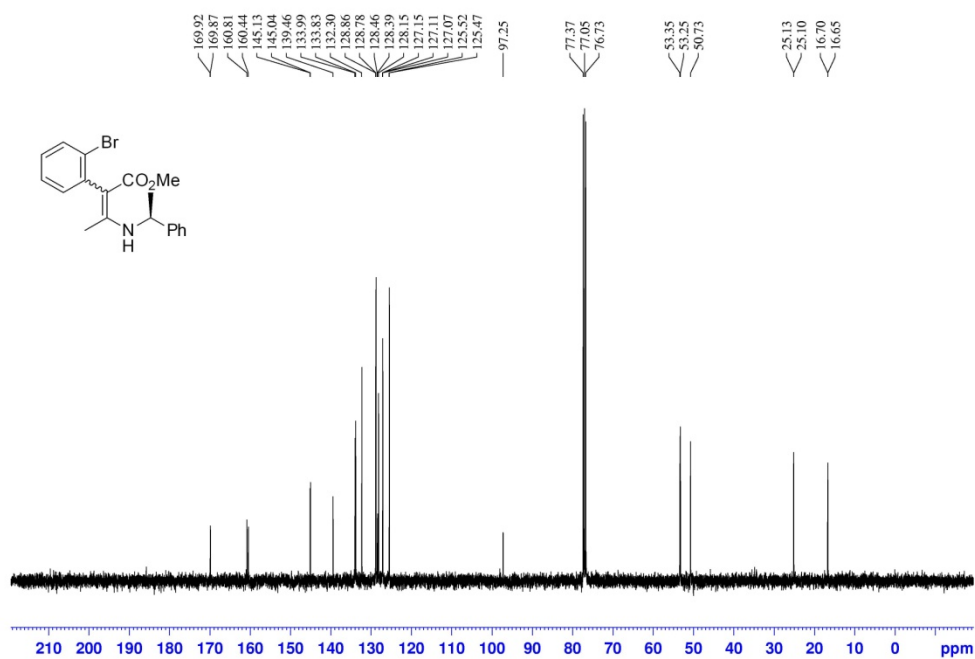

$^1\text{H}$  and  $^{13}\text{C}$  NMR spectra of compound **14**:

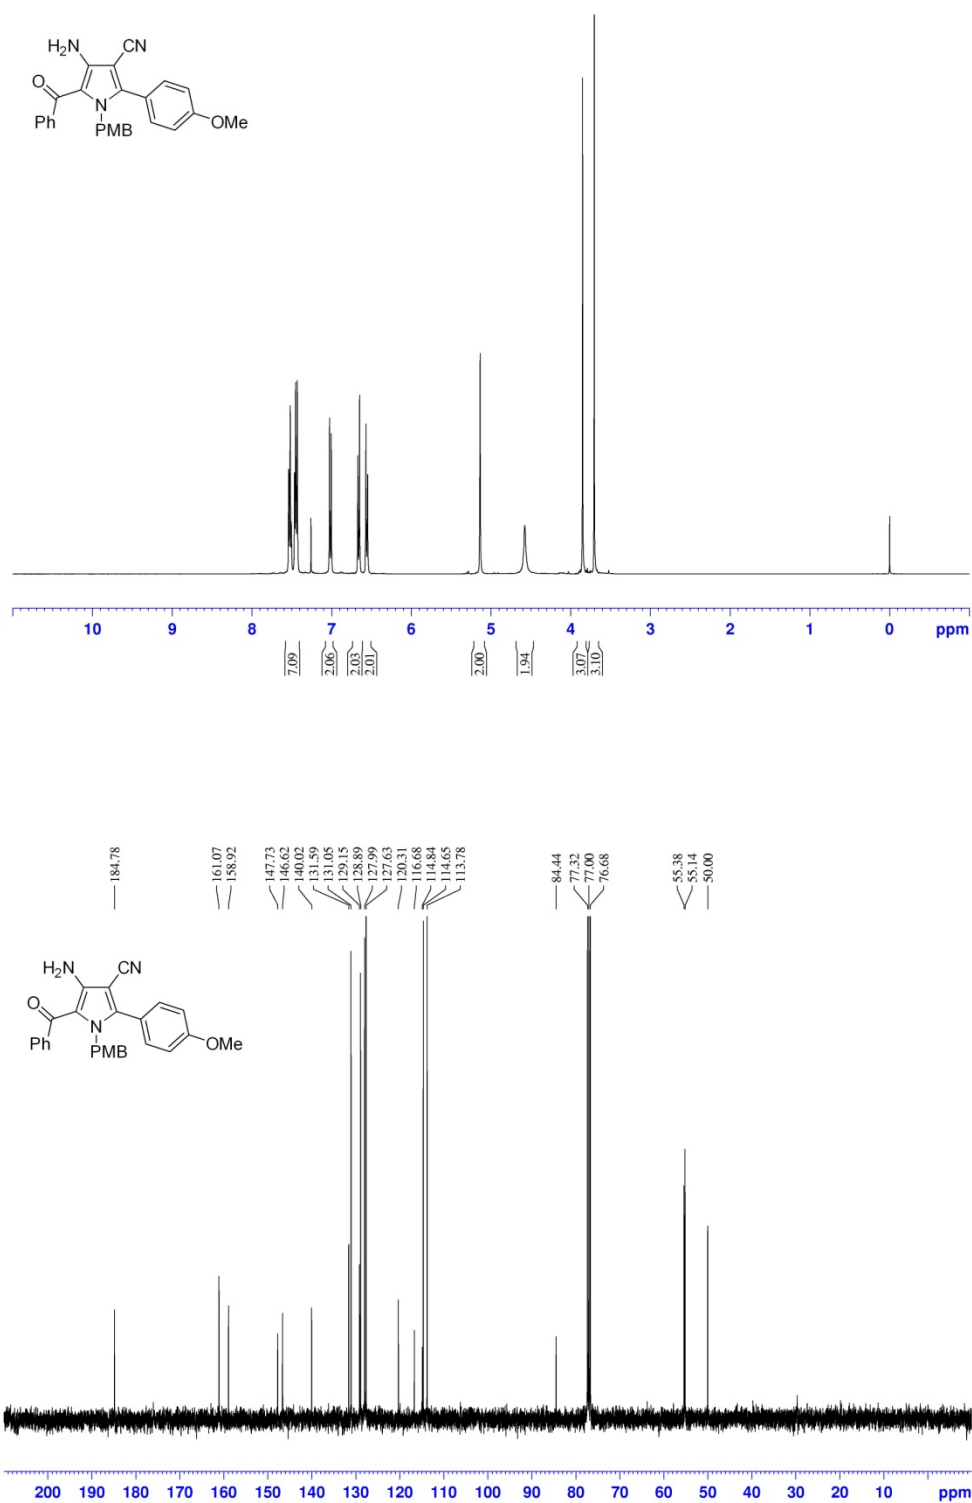

$^1\text{H}$  and  $^{13}\text{C}$  NMR spectra of compound **1ab**:

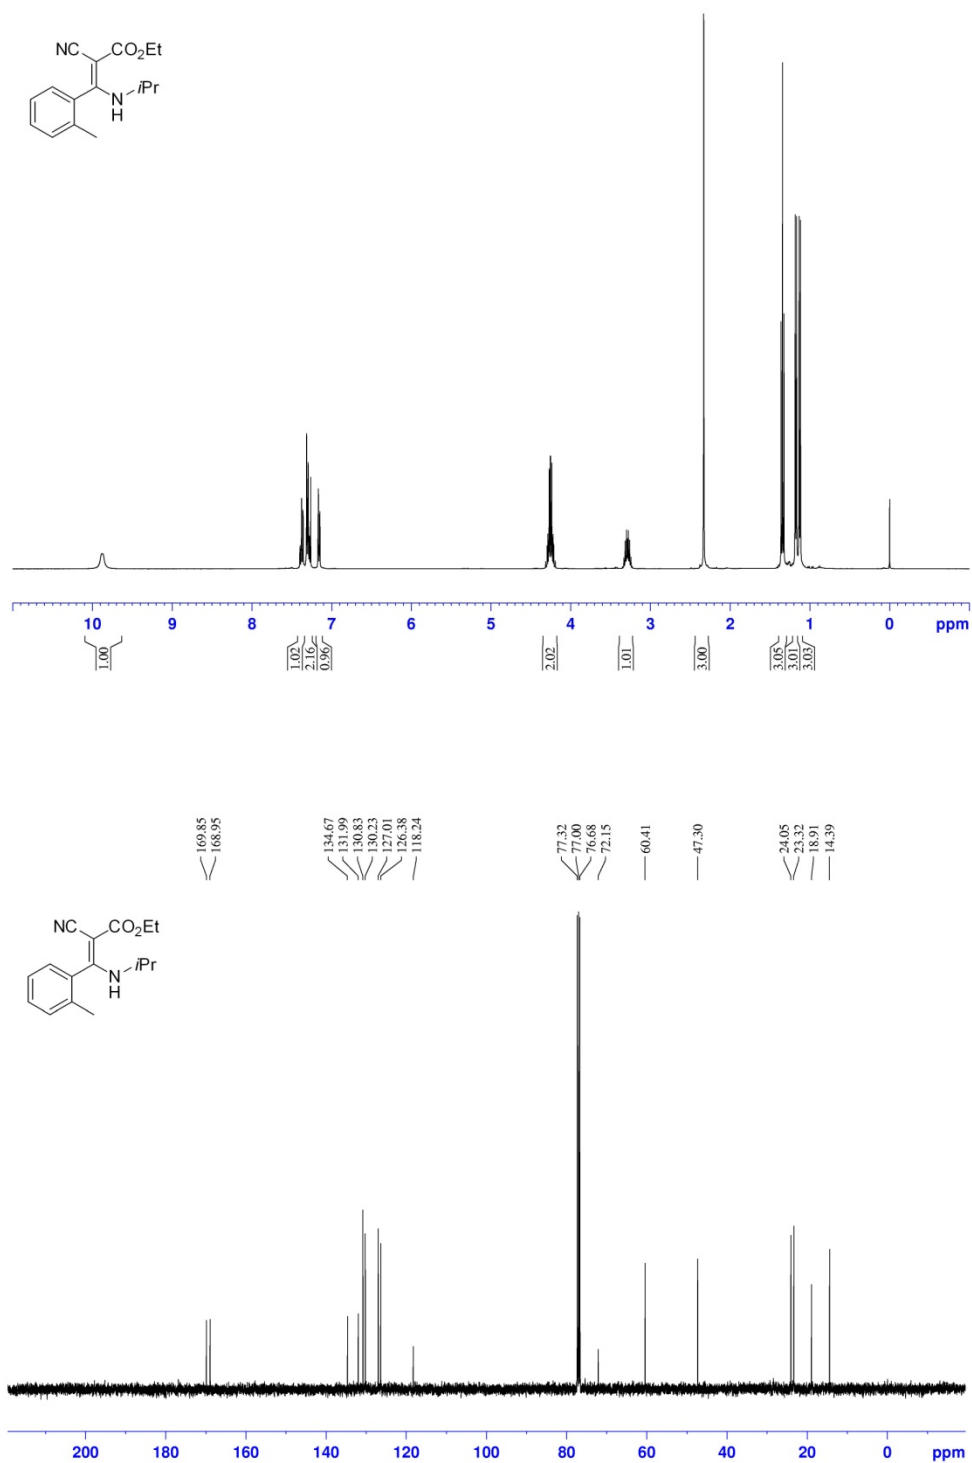

Supplement: c5qo00191a1.pdf [file c5qo00191a1.pdf]
